# Supplementary material
Source: PubMed Central journal article supplement (PMC4201586)
Supplement: NIHMS632607-supplement-Supp_Info_from_website.pdf [file NIHMS632607-supplement-Supp_Info_from_website.pdf]

## Supporting Information for

# Total Syntheses of the Histone Deacetylase Inhibitors Largazole and 2-*epi*-Largazole: Application of *N*-Heterocyclic Carbene-Mediated Acylations in Complex Molecule Synthesis.

*Bo Wang*<sup>†</sup>, *Po-Hsien Huang*<sup>‡</sup>, *Ching-Shih Chen*<sup>‡</sup>, and *Craig J. Forsyth*<sup>\*†</sup>

<sup>†</sup>Department of Chemistry, The Ohio State University, 100 W. 18<sup>th</sup> St., Columbus, OH 43210; <sup>‡</sup>College of Pharmacy, The Ohio State University, 500 W. 12<sup>th</sup> Ave., Columbus, OH 43210

\*forsyth@chemistry.ohio-state.edu

| Contents                                                                  | Page   |
|---------------------------------------------------------------------------|--------|
| General method for synthetic compounds                                    | 2      |
| <sup>1</sup> H NMR and <sup>13</sup> C NMR spectra of synthetic compounds | 3 – 33 |

12-22-2010

## General Method for Synthetic Compounds

All air sensitive reactions were carried out under argon in oven-dried glassware using standard syringe, cannula and septa techniques. Unless otherwise noted, all reactions were carried out at room temperature (20-25 °C). Molecular sieves were activated by heating at 120 °C for 24 h under vacuum. Tetrahydrofuran (THF), methylene chloride (CH<sub>2</sub>Cl<sub>2</sub>) and toluene were purified with a pressurized alumina column-based solvent purification system. Acetonitrile (CH<sub>3</sub>CN) and *N,N*-diisopropylethylamine (*i*-Pr<sub>2</sub>NEt) were distilled from CaH<sub>2</sub> under nitrogen. Microwave assisted reactions were performed in sealed-tube mode on a CEM Discover S-class reactor. Dimethyl sulfoxide (DMSO) was dried over 3 Å molecular sieves. Deuterated chloroform (CDCl<sub>3</sub>) was neutralized with anhydrous K<sub>2</sub>CO<sub>3</sub>. Other reagents were used as received from commercial sources. Flash column chromatography was performed using Silicycle SilicaFlash P60. Analytical TLC was performed with Silicycle glassed backed TLC extra hard layer 60 plates and Kieselgel silica gel 60 F<sub>254s</sub> HPTLC plates visualized by fluorescence upon 254 nm irradiation and/or staining with anisaldehyde reagent (450 mL of 90% ethanol, 25 mL of sulfuric acid, 15 mL of acetic acid, and 25 mL of anisaldehyde) or PMA reagent (phosphomolybdic acid 25 g, cerium(IV) sulfate 7.5 g, H<sub>2</sub>O 479 mL, H<sub>2</sub>SO<sub>4</sub> 25 mL). Preparative TLC was performed using Kieselgel silica gel 60 F<sub>254s</sub> HPTLC plates. The solvent combinations for flash column chromatography and TLC are described in volume ratios. <sup>1</sup>H NMR and <sup>13</sup>C NMR spectra were obtained in CDCl<sub>3</sub> and referenced to the residual CHCl<sub>3</sub> resonances at 7.27 ppm (<sup>1</sup>H) and 77.0 ppm (<sup>13</sup>C), or in CD<sub>3</sub>OD and referenced to the residual CH<sub>3</sub>OH resonances at 3.31 ppm (<sup>1</sup>H) and 49.0 ppm (<sup>13</sup>C), using 400 MHz or 500 MHz NMR instruments. Optical rotations were obtained using a polarimeter at the sodium D line (589 nm) using a 3.5 i.d. × 100 mm cylindrical glass cell and were reported in concentration (*c* = g/100 mL) at 22 °C. IR spectra were obtained with an Ir spectrometer. High resolution mass spectrometric analyses were performed with an electrospray ionization-time-of-flight mass spectrometer.

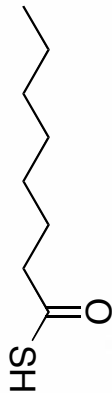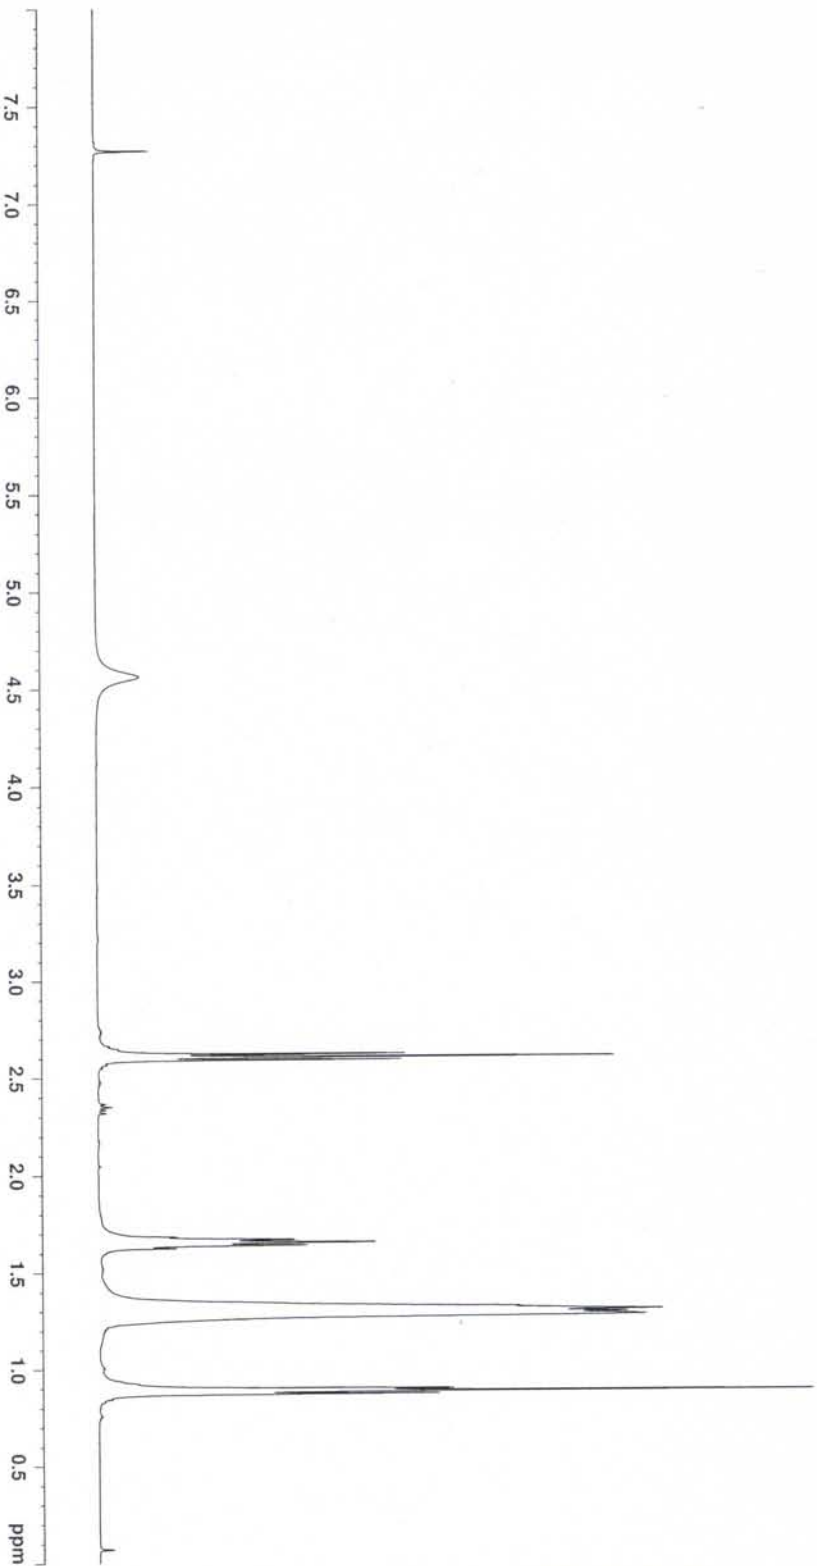

Current Data Parameters  
 NAME octanoic-thio-S-acid-H-500  
 PROCNM 1  
 F2 - Acquisition Parameters  
 File\_ 20080210  
 Time\_ 16.25  
 INSTRUM spect  
 PULPROG zgpg30  
 TO 65532  
 SOLVENT 2  
 DS 2  
 SH 10310.312 Hz  
 AQ 3.111923 sec  
 NS 400  
 PC 40.0 usec  
 TM 4.00 usec  
 TR 298.2 K  
 DI 1.000000 sec  
 DE 0.010000 sec  
 KMHX  
 ===== CHANNEL f1 =====  
 NUC1 1H  
 P1 14.50 usec  
 PL1 -1.00 dB  
 F1 500.021359 MHz  
 SFO 500.021359 MHz  
 F2 - Processing parameters  
 SI 32768 Hz  
 SF 500.020729 MHz  
 EQ 2  
 SSB 0  
 GB 0  
 PC 1.40

<sup>1</sup>H NMR spectrum of thiooctanoic S-acid (500 MHz, CDCl<sub>3</sub>)



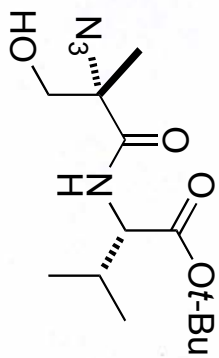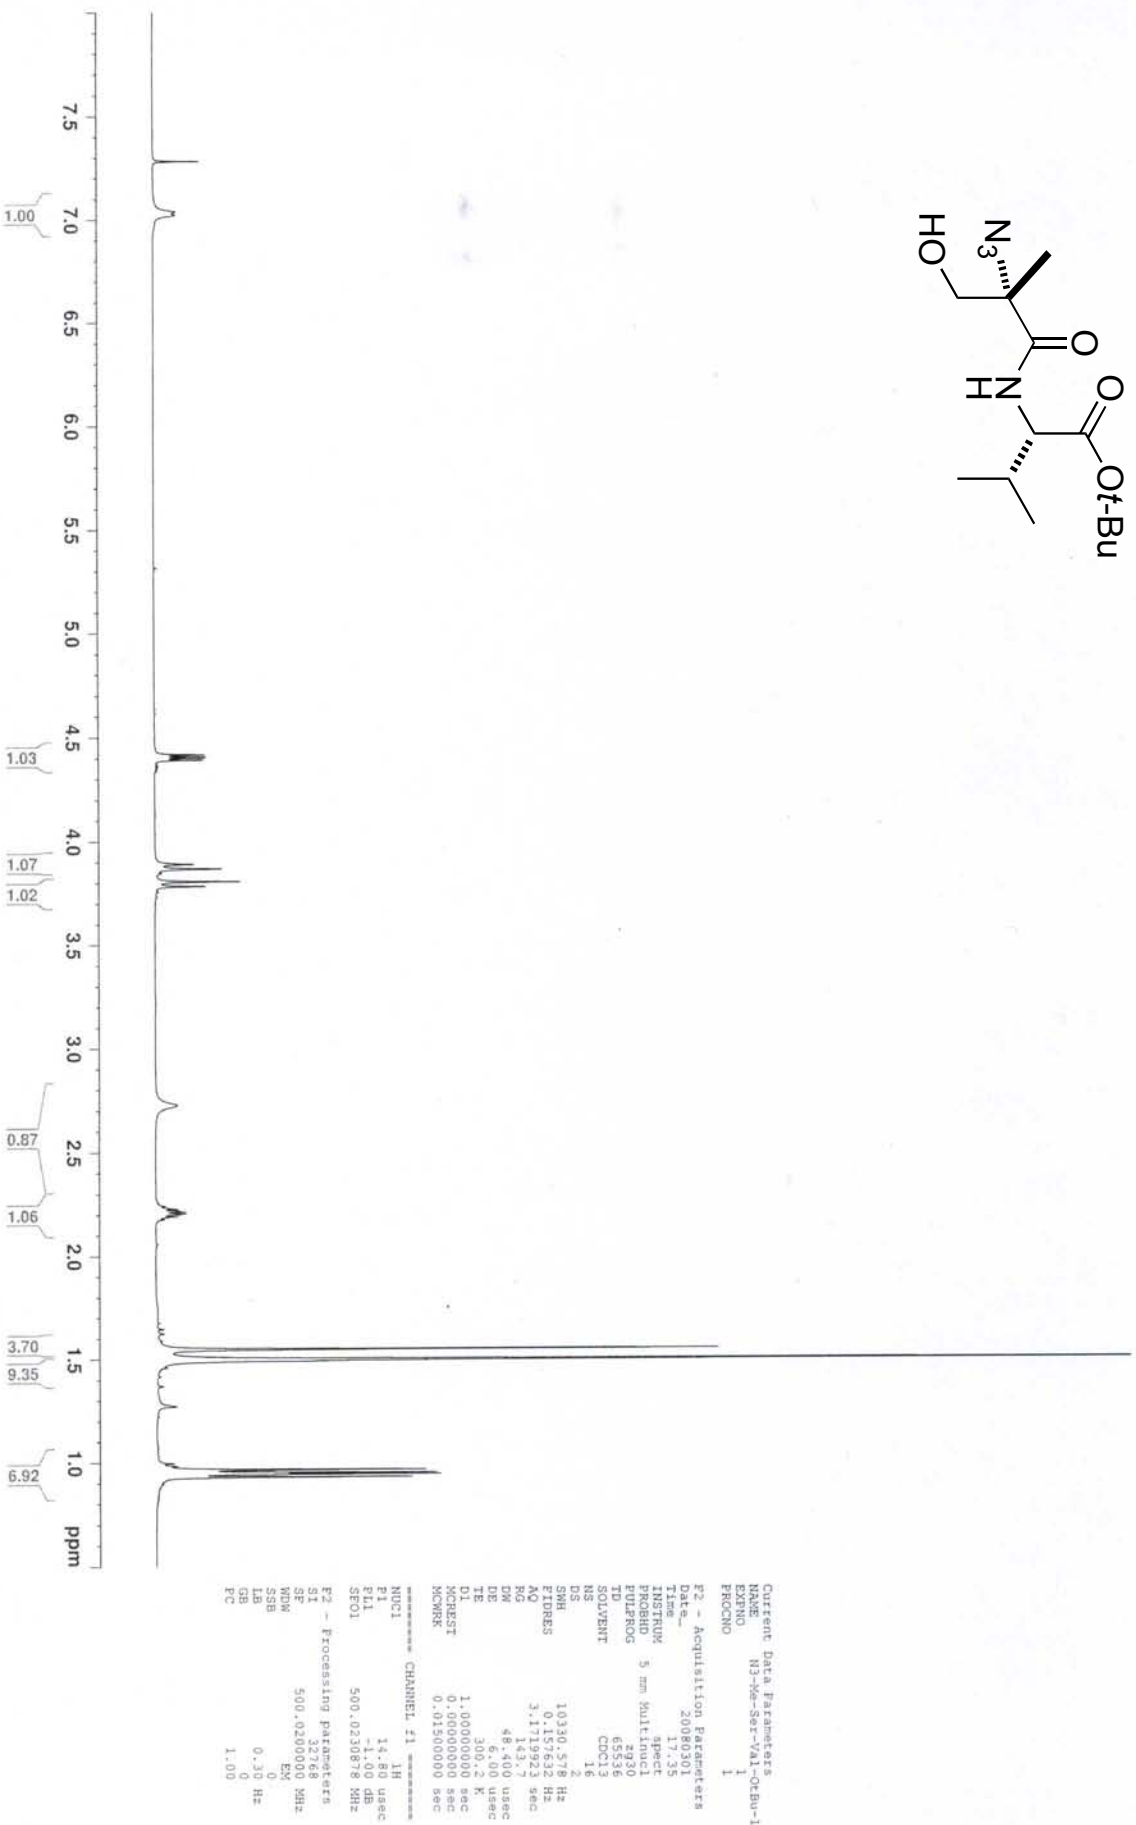

<sup>1</sup>H NMR spectrum for compound **15** (500 MHz, CDCl<sub>3</sub>)

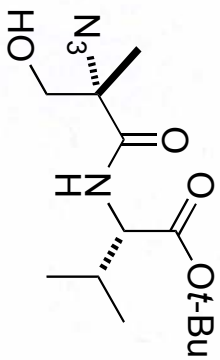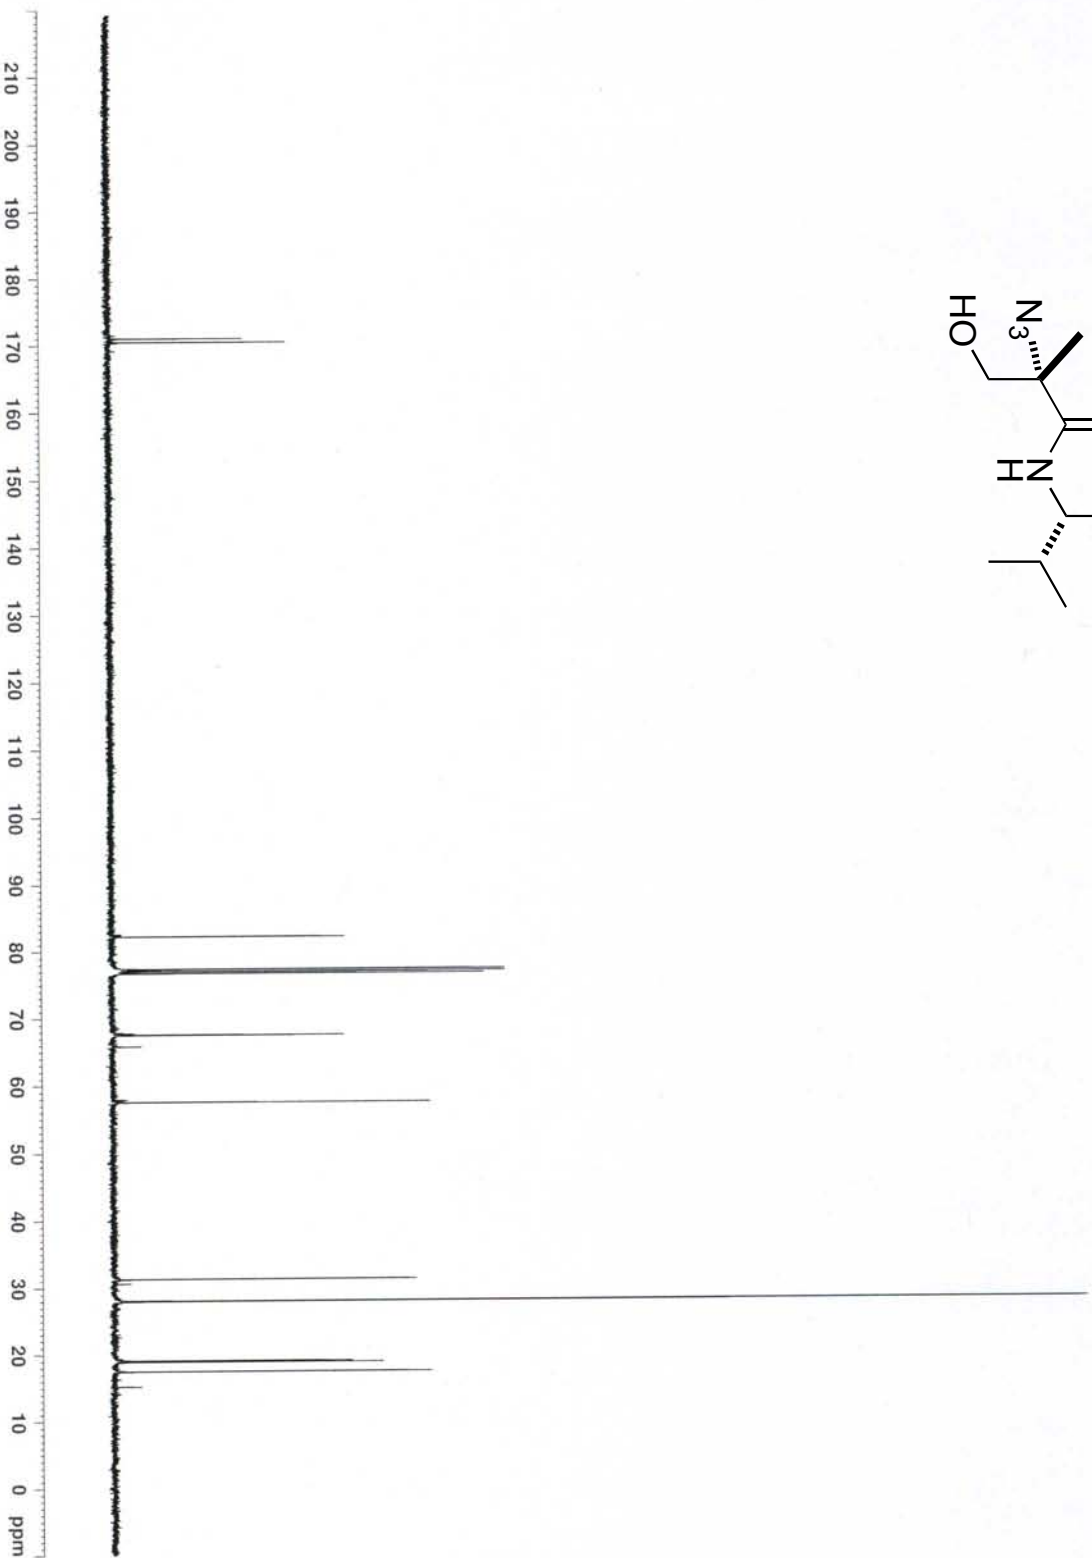

```

Current Data Parameters
NAME      Me-N3-Ser-Ya1-OtBu
EXPNO    1
PROCNO   1

F2 - Acquisition Parameters
Date_    20080409
Time     21.39
INSTRUM spect
PROBHD   5 mm QNP 1H/13
PULPROG zgpg30
TD       65536
SOLVENT  CDCl3
NS       385
DS       4
SWH      23980.814 Hz
FIDRES   0.365918 Hz
AQ       1.3664756 sec
RG       4597.6
DW       20.850 usec
DE       6.00 usec
TE       300.2 K
D1       2.00000000 sec
d11      0.03000000 sec
DELTA    1.89399998 sec
MCREST   0.00000000 sec
MCWRK    0.01500000 sec

===== CHANNEL f1 =====
NUC1      13C
P1       10.50 usec
PL1      0.00 dB
SFO1     100.6228298 MHz

===== CHANNEL f2 =====
CPDPRG2  waltz16
NUC2      13C
PCPD2    80.00 usec
PL2      -6.00 dB
PL12     14.56 dB
PL13     14.50 dB
SFO2     400.1316005 MHz

F2 - Processing parameters
SI       32768
SF       100.6127690 MHz
WDW      EM
SSB      0
LB       1.00 Hz
GB       0
PC       1.00
  
```

$^{13}\text{C}$  NMR spectrum for compound **15** (500 MHz,  $\text{CDCl}_3$ )

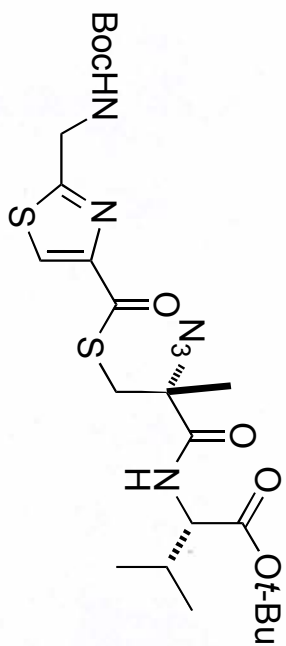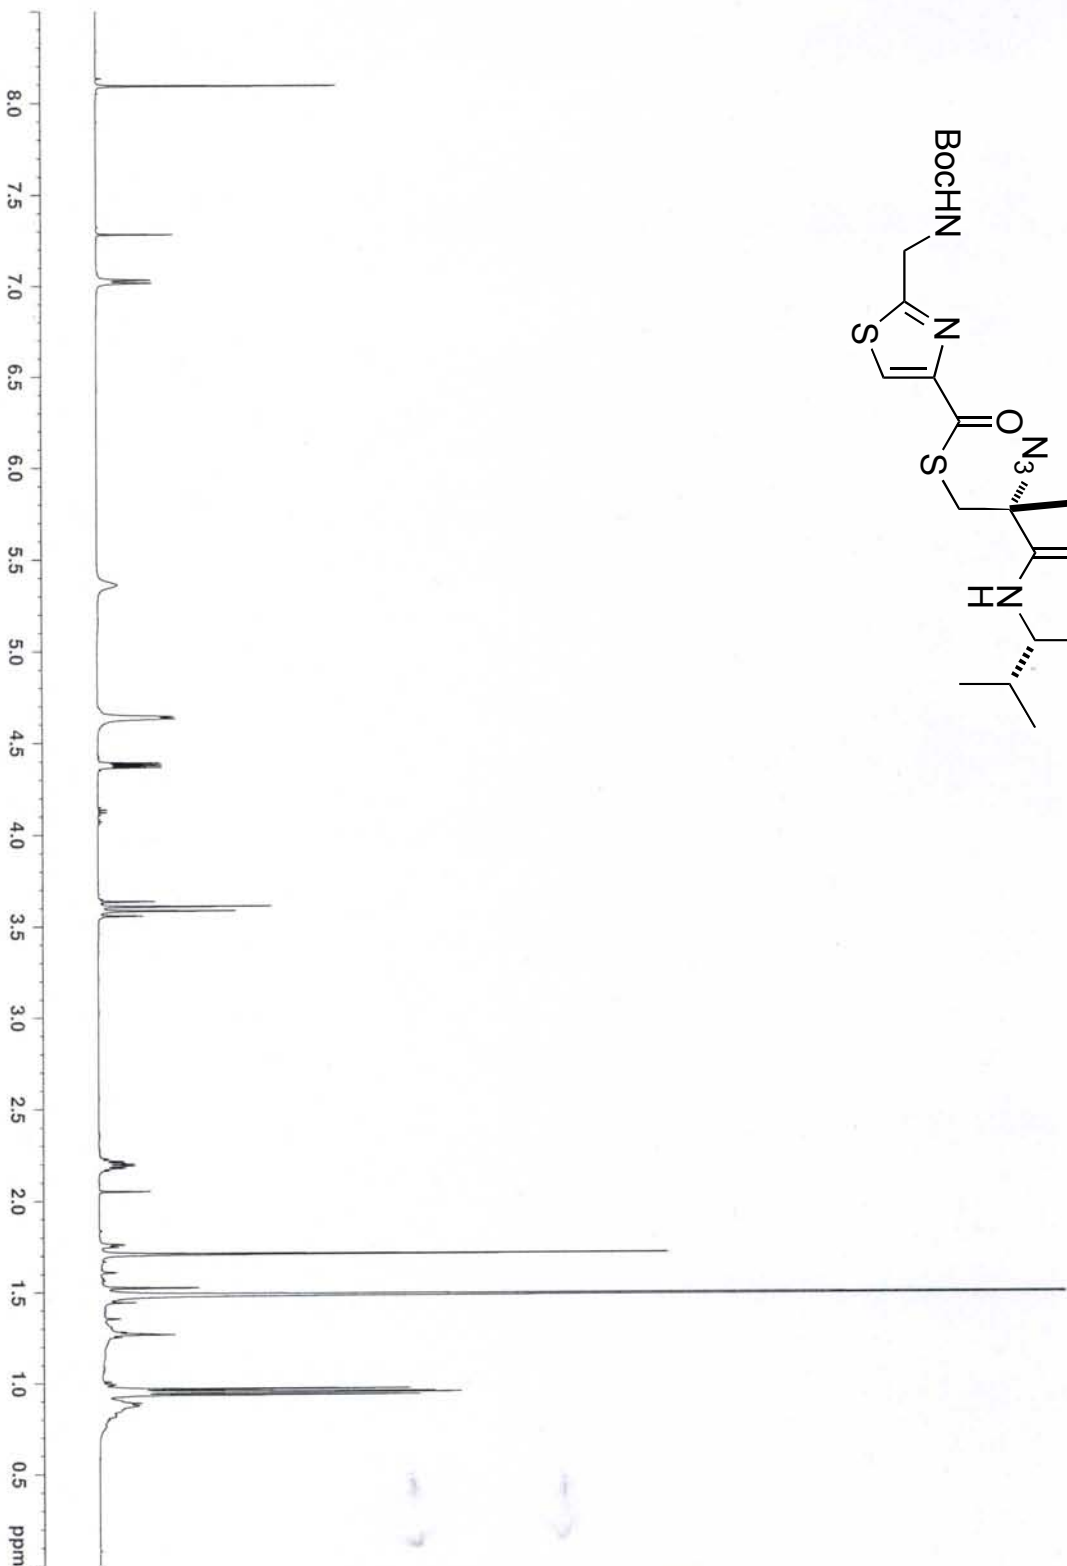

```

Current Data Parameters
NAME      thiazole-thioester-1
EXPNO     1
PROCNO    1

F2 - Acquisition Parameters
Date_     20080605
Time      20.29
INSTRUM   spect
PROBHD    5 mm Multinucl
PULPROG   zg30
TD         65536
SOLVENT   CDCl3
NS         1024
DS         2
SWH        10330.578 Hz
FIDRES     0.157632 Hz
AQ         3.1719923 sec
RG         101.6
DM         48.400 usec
DE         1.0000000 usec
TE         300.2 K
D1         1.00000000 sec
MCREST    0.00000000 sec
MCMRR     0.01500000 sec

===== CHANNEL f1 =====
NUC1       13C
P1         14.80 usec
PL1        -1.00 dB
SFO1       500.0230878 MHz

F2 - Processing parameters
SI         32768
SF         500.0200900 MHz
WDW        EM
SSB        0
LB         0.30 Hz
GB         0
PC         1.40
  
```

$^1\text{H}$  NMR spectrum for compound **19** (500 MHz,  $\text{CDCl}_3$ )

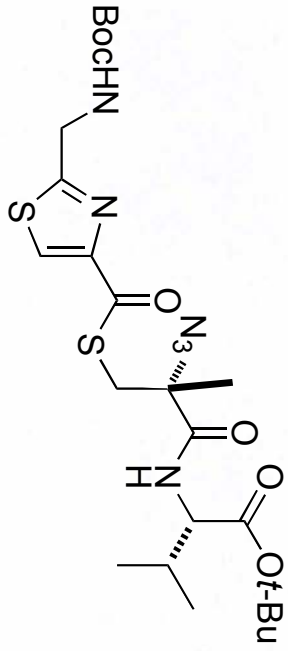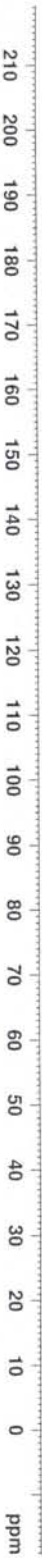

$^{13}\text{C}$  NMR spectrum for compound **19** (500 MHz,  $\text{CDCl}_3$ )

```

Current Data Parameters
NAME          Chazote-thioester-C-1
EXPNO        1
PROCNO       1

F2 - Acquisition Parameters
Date_         20080602
Time         20.54
INSTRUM      spect
PROBHD       5 mm Multinuc1
PULPROG      zgpg30
SFO2         125.760
SOLVENT      CDCl3
NS           250
DS           4
SWH          30039.522 Hz
AQ           10.041222 sec
RG           1.032244 sec
RG           4096
DE           16.650 usec
DE           12.00 usec
DI           2.0000000 sec
DL           0.030000000 sec
DELTA        1.89999998 sec
ACQRES       0.0000000 sec
MCKRES       0.02500000 sec

===== CHANNEL f1 =====
NUC1          13C
P1           12.00 usec
SFO1         125.762720 MHz

===== CHANNEL f2 =====
CPDPRG2      waltz16
NUC2          100.613
P2           100.00 usec
SFO2         -1.00 dB
P12          18.60 dB
P13          22.50 dB
SFO2         500.0220001 MHz

F2 - Processing parameters
SI           32768
SF           125.7301290 MHz
RG           64
PC           1.40 Hz
DB           0
PC           1.40
  
```



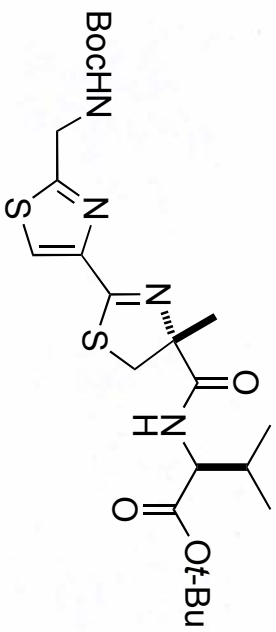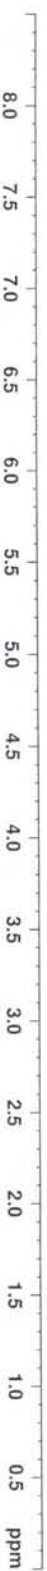

```

NAME: 5
EXPNO: 2
PROCNO: 1
PROCNAME: 5
F2 - Acquisition Parameters
Date_UTC: 20170811
Time: 14.17
INSTRUM: spect
PROBHD: 5 mm BBO (1H/13
PULPROG: zgpg30
TD: 65536
AQ: 0.1871
RG: 512
AQ: 0.1871
SFO: 500.136
SF: 500.136188
WDW: EM
SSB: 0
GB: 0
EC: 0
RO: 0
DE: 0
TE: 300.2
FIDRES: 0.1416000
AQRES: 0.0002000
RG1: 1024
RG2: 1024
RG3: 1024
SAMPLN: 65536
SAMPLF: 11.700000
F2 - Processing parameters
SI: 32768
SF: 500.136188
WDW: EM
SSB: 0
GB: 0
EC: 0
RO: 0
DE: 0
TE: 300.2
FIDRES: 0.1416000
AQRES: 0.0002000
RG1: 1024
RG2: 1024
RG3: 1024
SAMPLN: 65536
SAMPLF: 11.700000
SI: 32768
SF: 500.136188
WDW: EM
SSB: 0
GB: 0
EC: 0
RO: 0
DE: 0
TE: 300.2
FIDRES: 0.1416000
AQRES: 0.0002000
RG1: 1024
RG2: 1024
RG3: 1024
SAMPLN: 65536
SAMPLF: 11.700000

```

<sup>1</sup>H NMR spectrum for compound 5 (500 MHz, CDCl<sub>3</sub>)

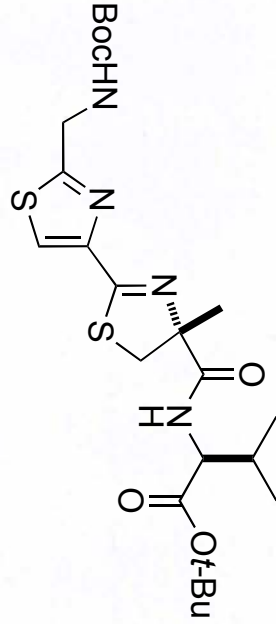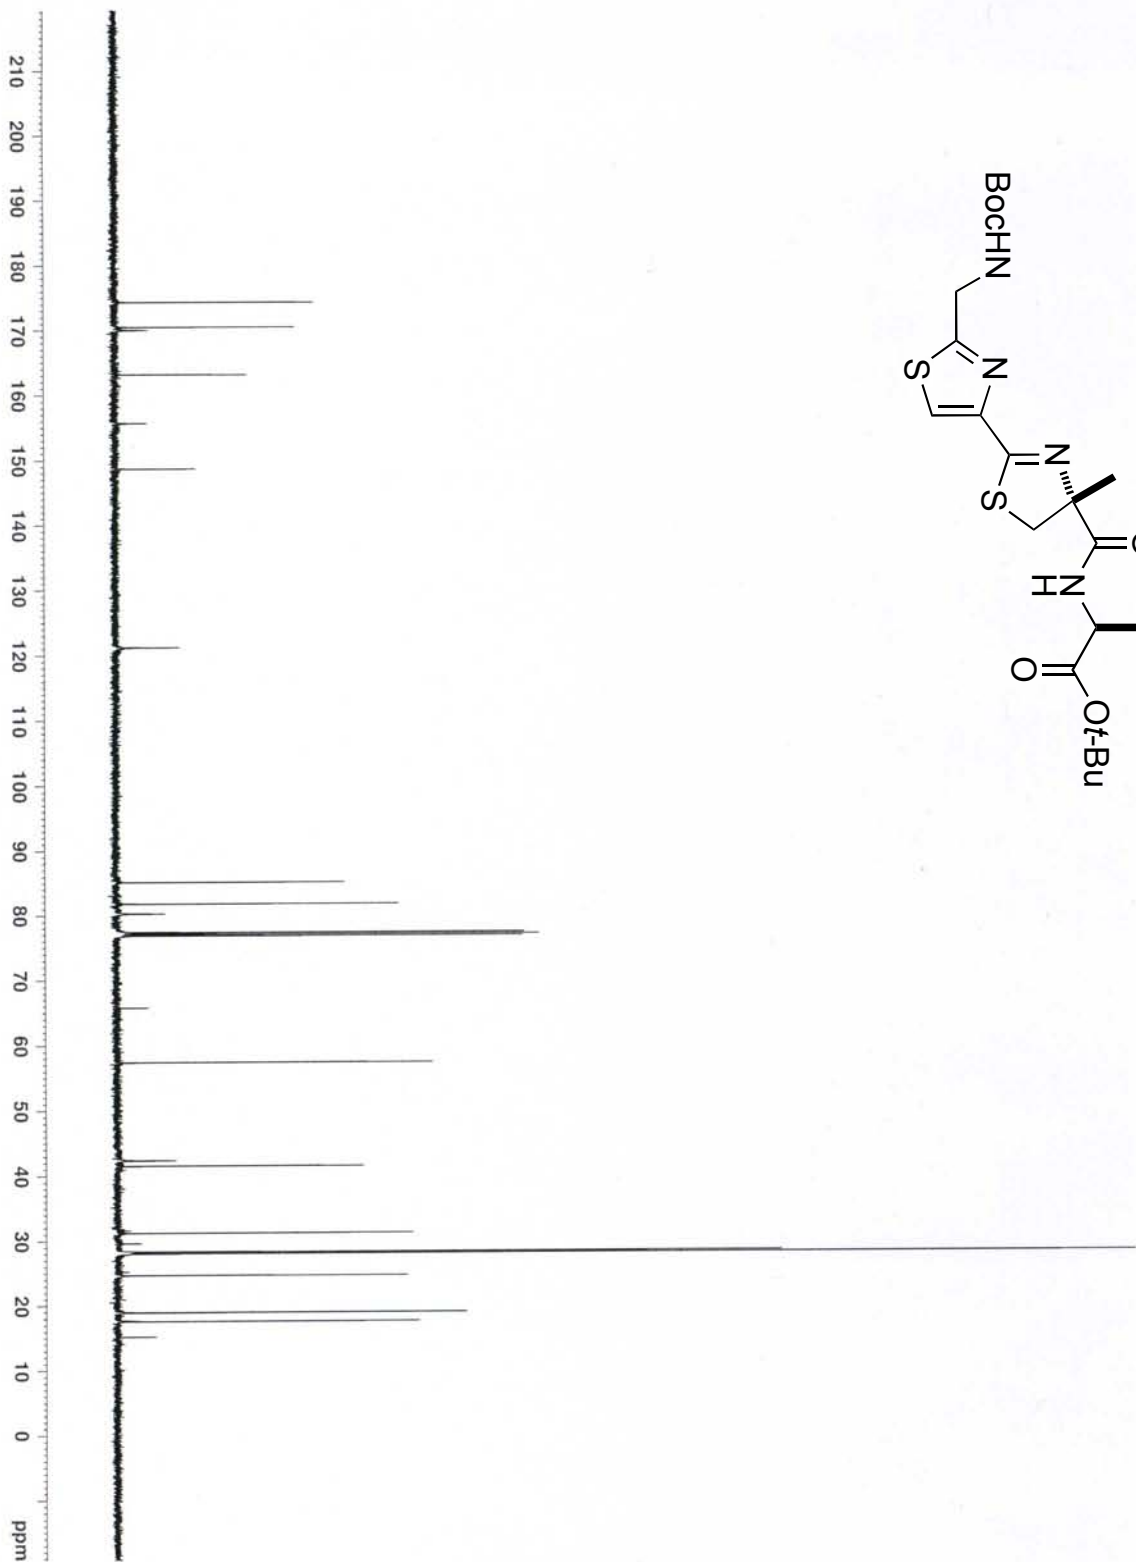

```

Current Data Parameters
NAME      BOCHN-114V212-41444114-00789-C
PROCNO   1
P1       12.00
P2       12.00
P3       123.762500 MHz
===== CHANNEL F2 =====
NUC1     13C
P1       12.00
P2       12.00
P3       123.762500 MHz
===== CHANNEL F1 =====
NAME      BOCHN-114V212-41444114-00789-C
PROCNO   1
P1       12.00
P2       12.00
P3       123.762500 MHz
===== CHANNEL F2 =====
===== CHANNEL F1 =====
Date_    20060407
Time     11:00
INSTRUM  spect
PROBHD   5 mm NAL-1H/13
PULPROG  zgpg30
TD        65536
AQ       0.218
RG       327.5
WDW      EM
SSB      0
GB       0
PC       218
===== Acquisition Parameters =====
SFO1     300.131329 MHz
NUC1     13C
P1       12.00
PC       218.00
===== Processing parameters =====
SI       32768
SF       125.762500 MHz
WDW      EM
SSB      0
GB       0
PC       218.00
=====
  
```

<sup>13</sup>C NMR spectrum for compound **5** (500 MHz, CDCl<sub>3</sub>)

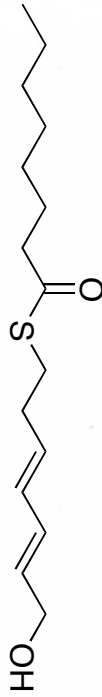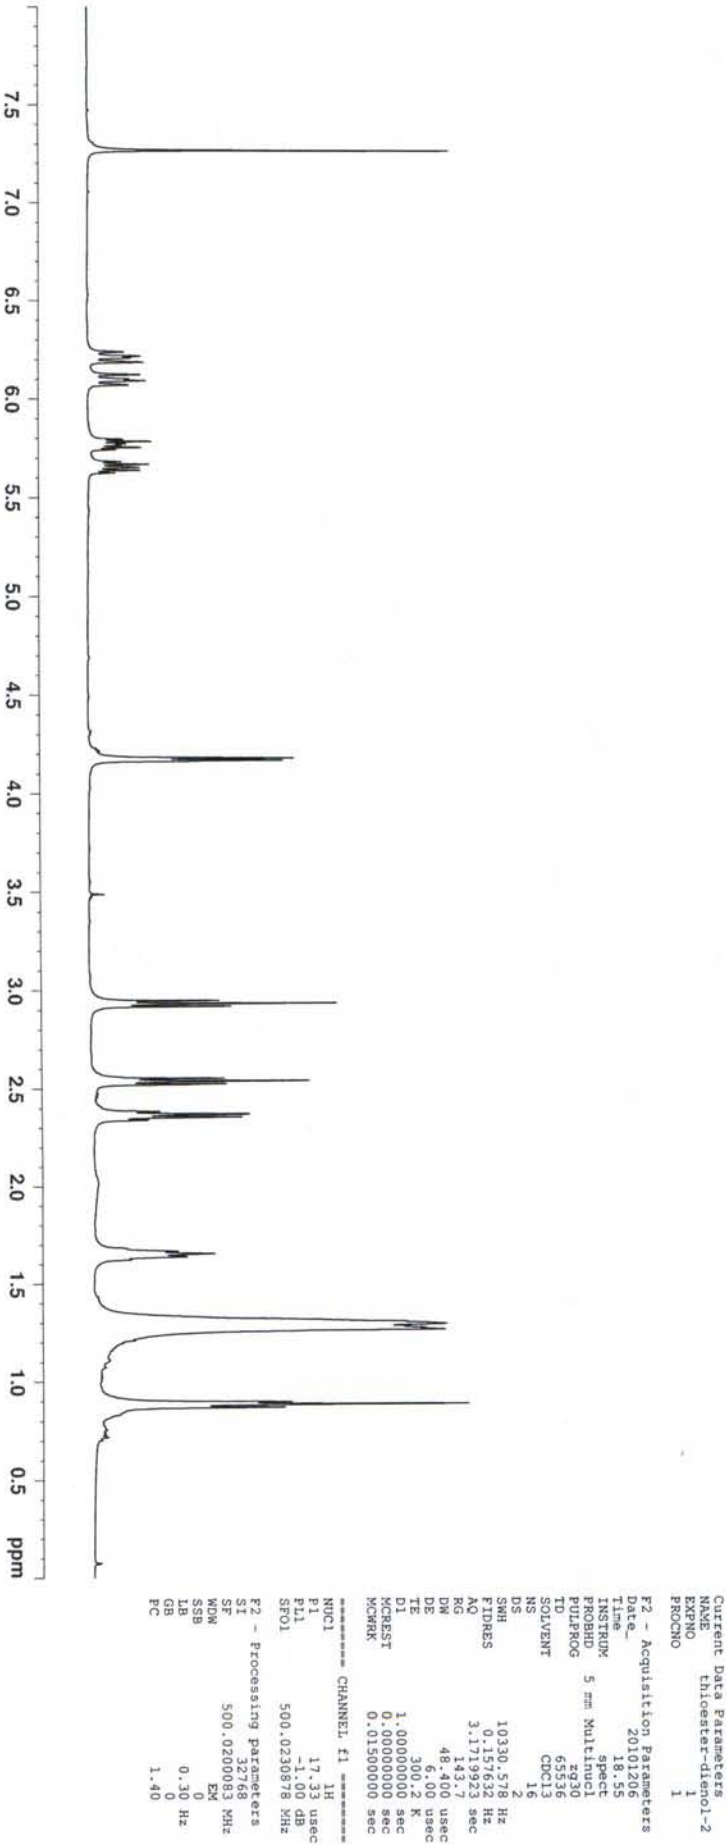

<sup>1</sup>H NMR spectrum for compound **21** (500 MHz, CDCl<sub>3</sub>)

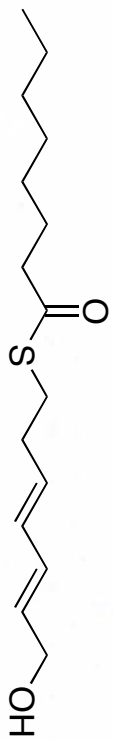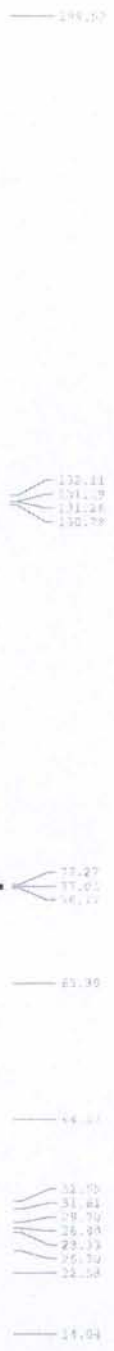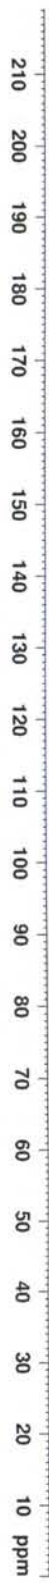

Current Data Parameters  
 NAME thioester-dienol-C-2  
 EXPNO 1  
 PROCNO 1

F2 - Acquisition Parameters  
 Date\_ 20101206  
 Time 19.02  
 INSTRUM spect  
 PROBHD 5 mm Multinuc1  
 PULPROG zgpg30  
 TD 65536  
 SFO 125.130  
 SOLVENT CDCl3  
 NS 573  
 DS 4  
 SWH 30030.029 Hz  
 FIDRES 0.458222 Hz  
 AQ 1.0912244 sec  
 RG 3251  
 DW 16.650 usec  
 DE 12.400 usec  
 TE 300.2 K  
 D1 2.00000000 sec  
 d11 0.03000000 sec  
 DELTA 1.89999998 sec  
 MCREST 0.00000000 sec  
 MCMRK 0.01500000 sec

===== CHANNEL f1 =====  
 NUC1 13C  
 P1 27.00 usec  
 PL 1.00 dB  
 SFO1 125.7427020 MHz

===== CHANNEL f2 =====  
 CPDPRG2 waltz16  
 NUC2 13C  
 P2 68.00 usec  
 PL2 -1.00 dB  
 PL12 10.87 dB  
 PL13 22.50 dB  
 SFO2 500.0220001 MHz

F2 - Processing parameters  
 SI 32768  
 SF 125.7301290 MHz  
 MDW EX 0  
 SSB 0  
 LB 1.00 Hz  
 GB 0  
 FC 1.40

<sup>13</sup>C NMR spectrum for compound 21 (500 MHz, CDCl<sub>3</sub>)

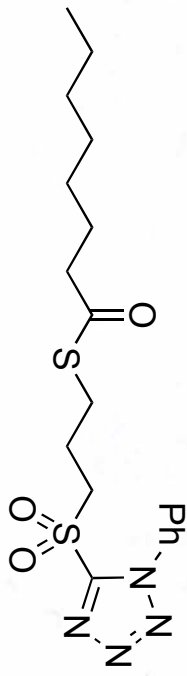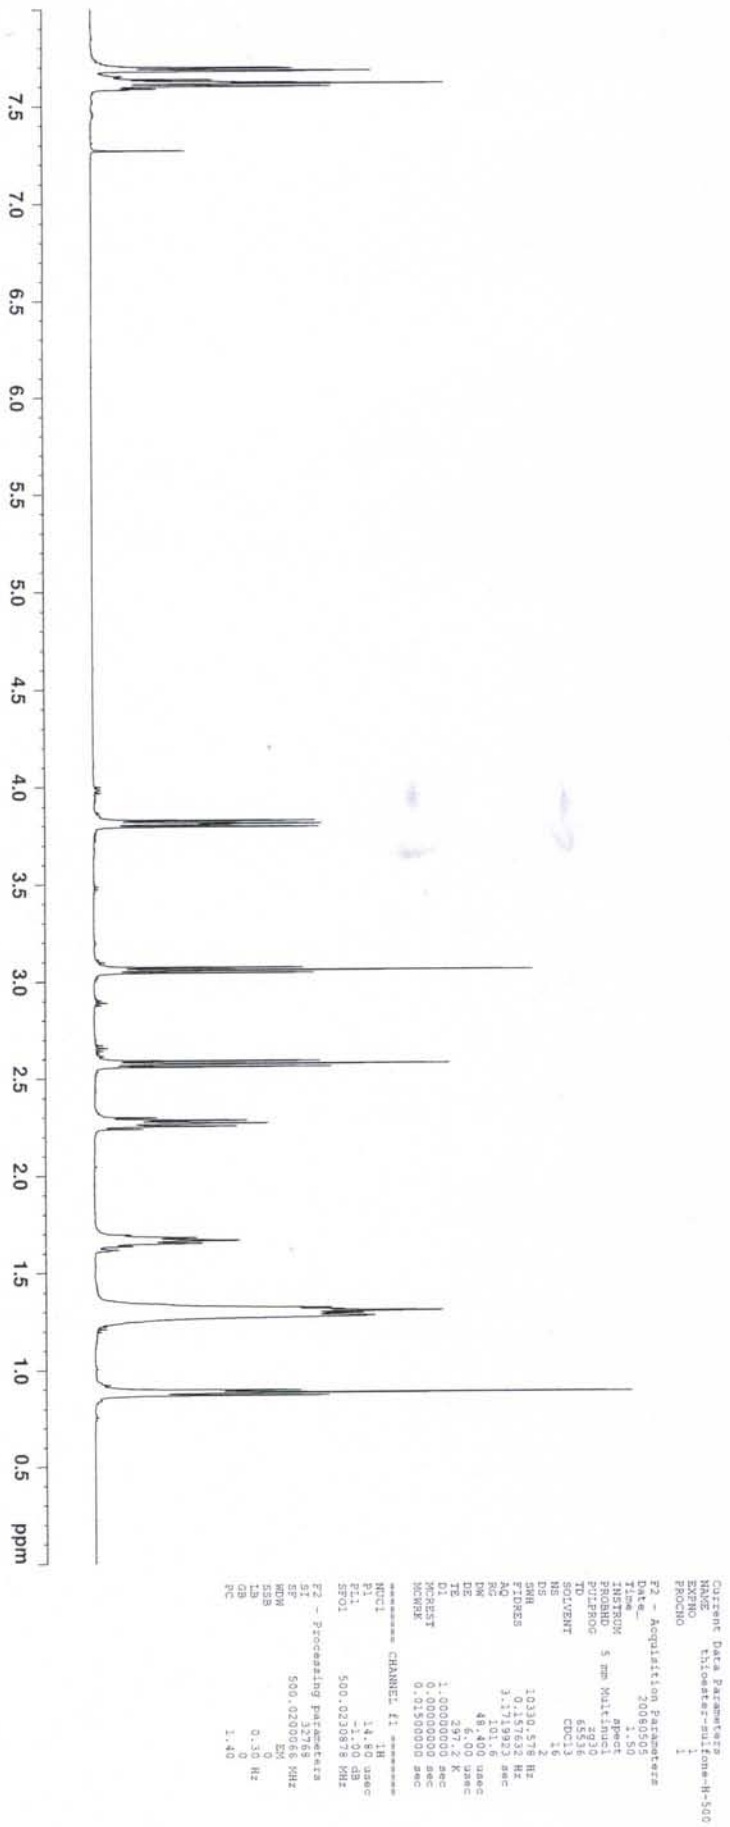

<sup>1</sup>H NMR spectrum for compound **24** (500 MHz, CDCl<sub>3</sub>)

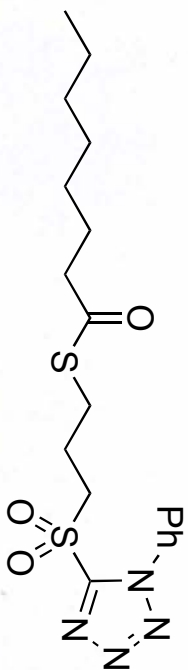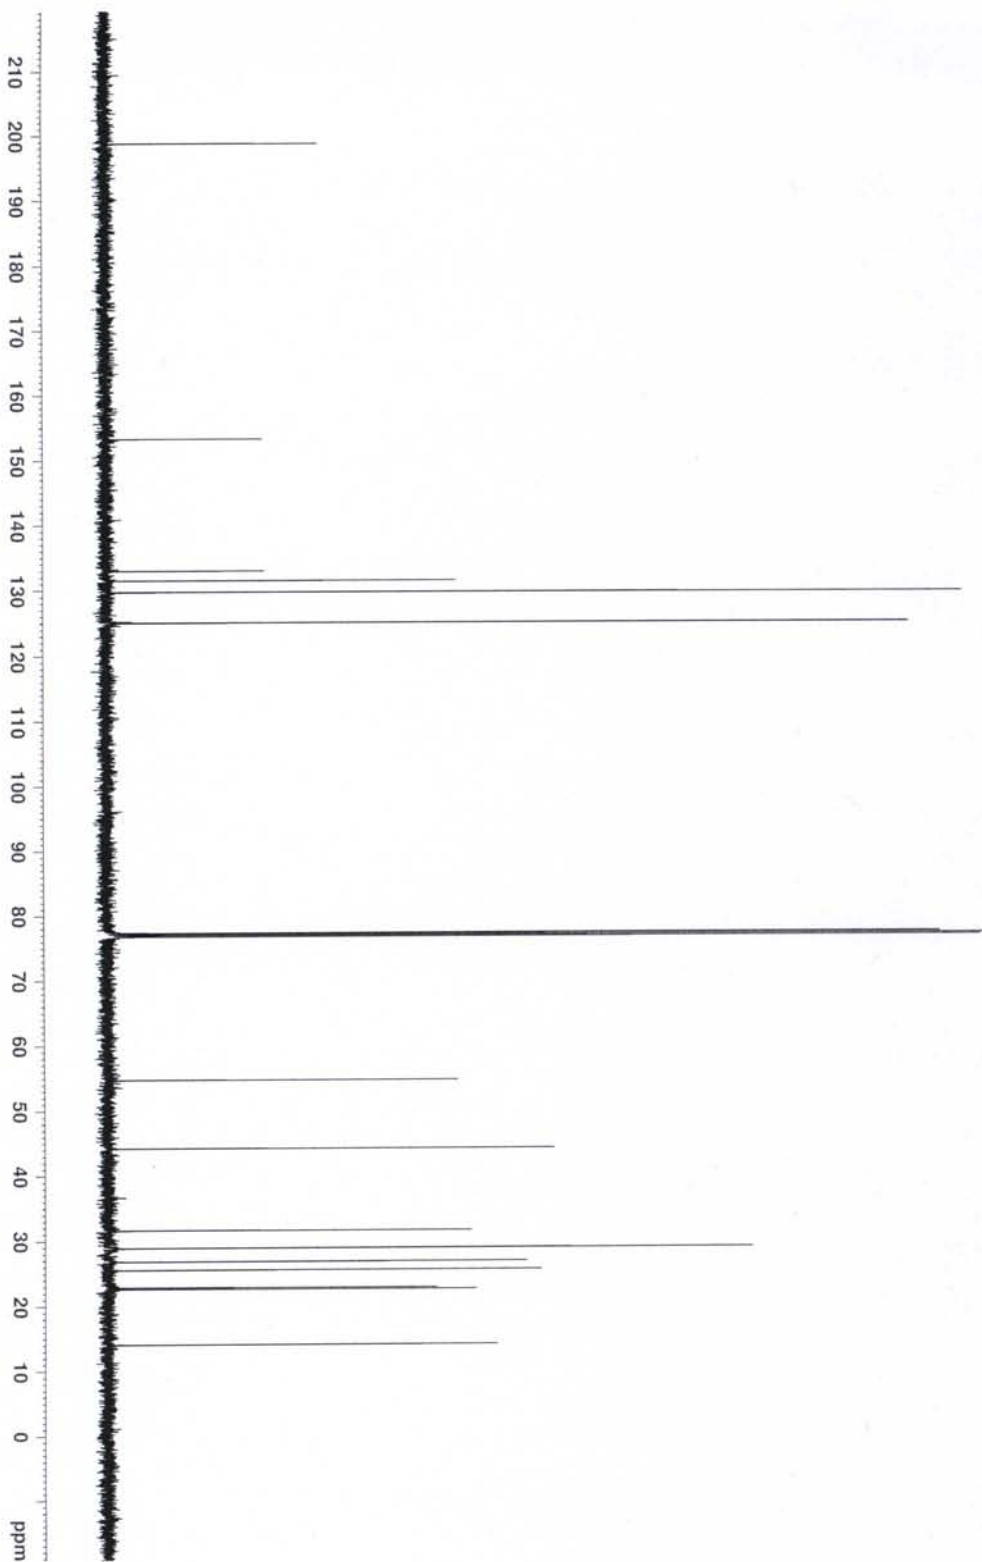

$^{13}\text{C}$  NMR spectrum for compound **24** (500 MHz,  $\text{CDCl}_3$ )

```

Current Data Parameters
NAME      thioacet-Phazlam-C-500
EXPNO    1
PROCNO   1
F2 - Acquisition Parameters
Date_    20080505
Time     2.00
INSTRUM  spect
PROBHD   5 mm Nal:Innc1
PULPROG  zgpg30
TD        65536
SOLVENT  DMS-d6
NS        434
DS        4
SWH       6058.834 Hz
FWHM      0.6322 Hz
AQ         1.0912844 sec
RG         7298.1
AQ         12.00 usec
DM         12.00 usec
TE        297.2 K
D1         2.0000000 sec
d11        1.3000000 sec
DELTA     0.0000000 sec
INTEGR    0.01500000 sec
MCRMASK  0.01500000 sec

===== CHANNEL f1 =====
NUC1      13C
P1         12.00 usec
PL1        0 dB
SFO1      125.762800 MHz

===== CHANNEL f2 =====
GRPPROG  waltz16
NUC2      1H
PCPD2     100.00 usec
PL2        0 dB
PL12       1.80 dB
PL13       22.50 dB
SFO2      500.0218001 MHz

F2 - Processing parameters
SI         32768
SF         125.761280 MHz
SD         0
SOLVENT   DMS
L3         1.00 Hz
DS         1.40
  
```



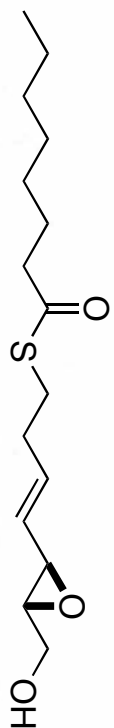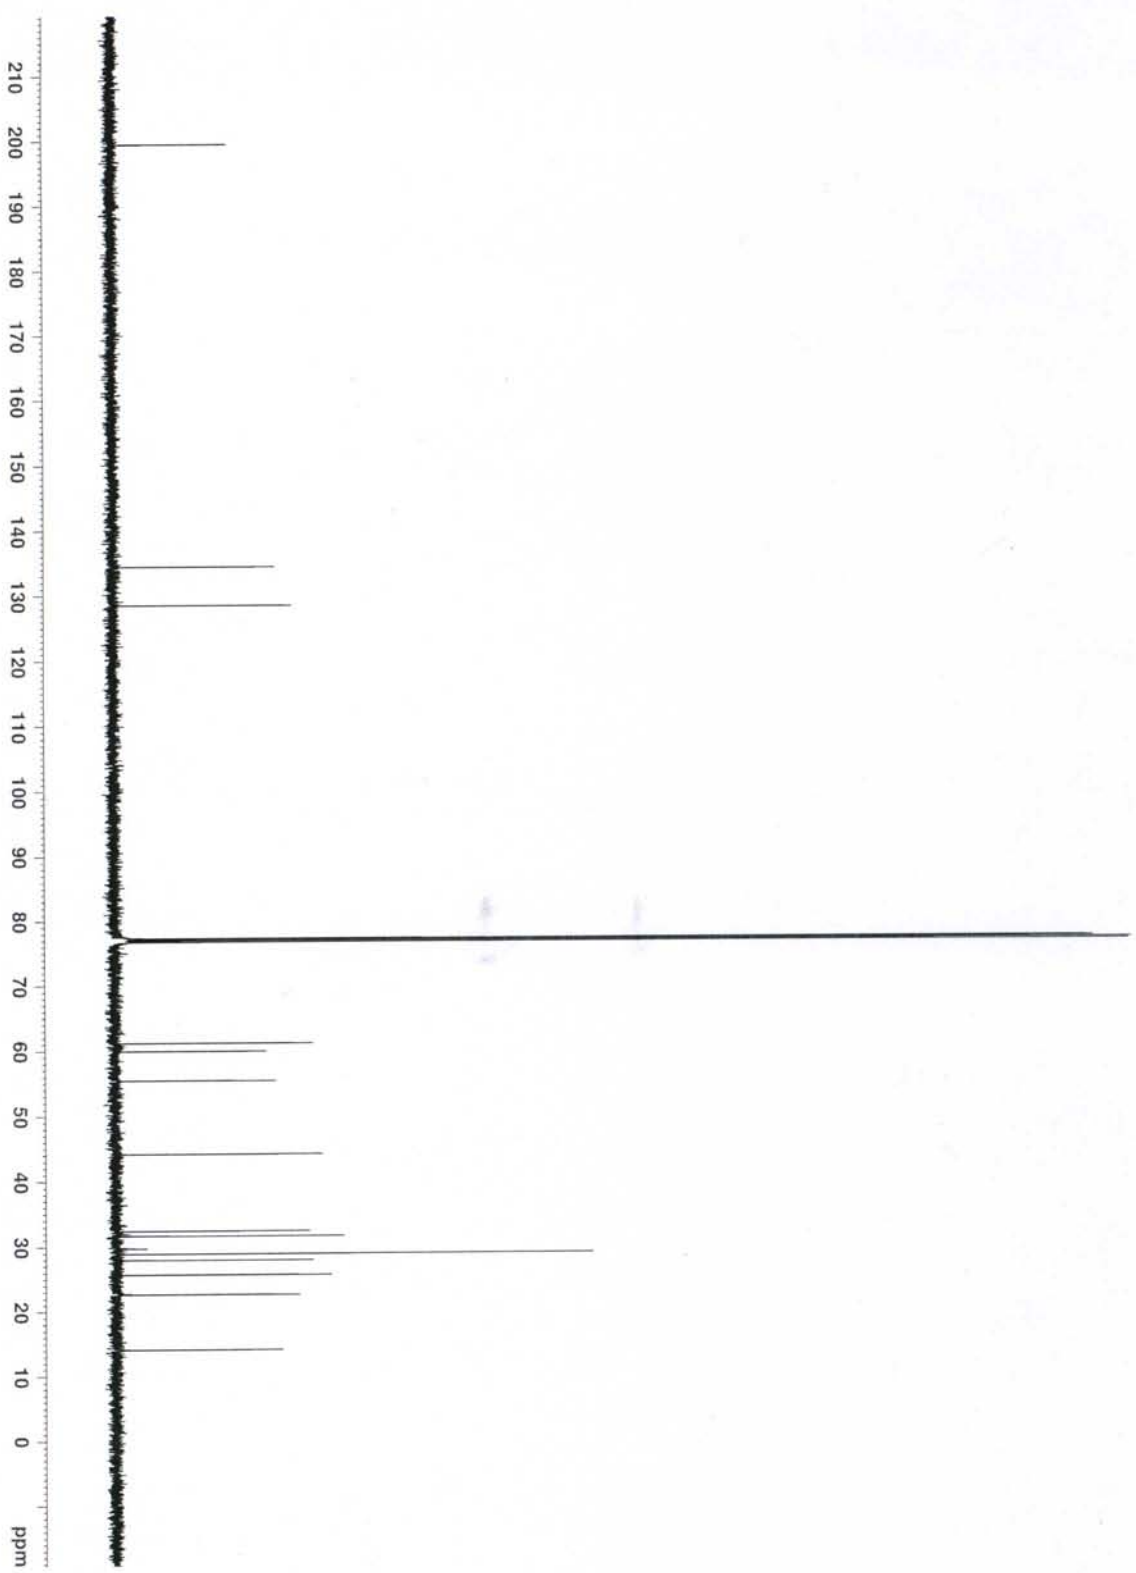

Current Data Parameters  
 NAME: Thioester-epoxyalcohol-C-508  
 EXPNO: 1  
 PROCNO: 1  
 F2 - Acquisition Parameters  
 Date\_ 20080226  
 Time 0:26  
 INSTRUM spect  
 PULPROG zgpg30  
 F2 - 5 mm Malt  
 TD 65536  
 SFO 299.13  
 CHANID 13C  
 NUC1 13C  
 NU1 13C  
 P1 12.00 usec  
 PL1 0.00 dB  
 SFO1 125.767200 MHz  
 CHANNEL f1 13C  
 NU1 13C  
 P1 12.00 usec  
 PL1 0.00 dB  
 SFO1 125.767200 MHz  
 CHANNEL f2  
 CPDPRG2 waltz16  
 NUC2 1H  
 P1 100.18 usec  
 PL2 -1.00 dB  
 SFO2 500.1362001 MHz  
 F2 - Processing parameters  
 SI 32768  
 SF 125.7601250 MHz  
 CH 64  
 SC 8192  
 LB 1.00 Hz  
 GB 0  
 BR 1.40

<sup>13</sup>C NMR spectrum for compound **22** (500 MHz, CDCl<sub>3</sub>)





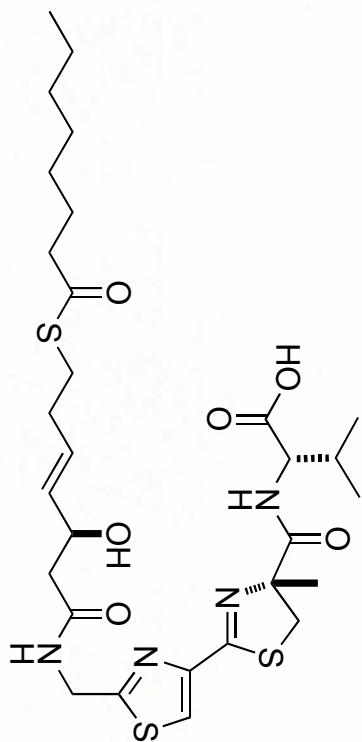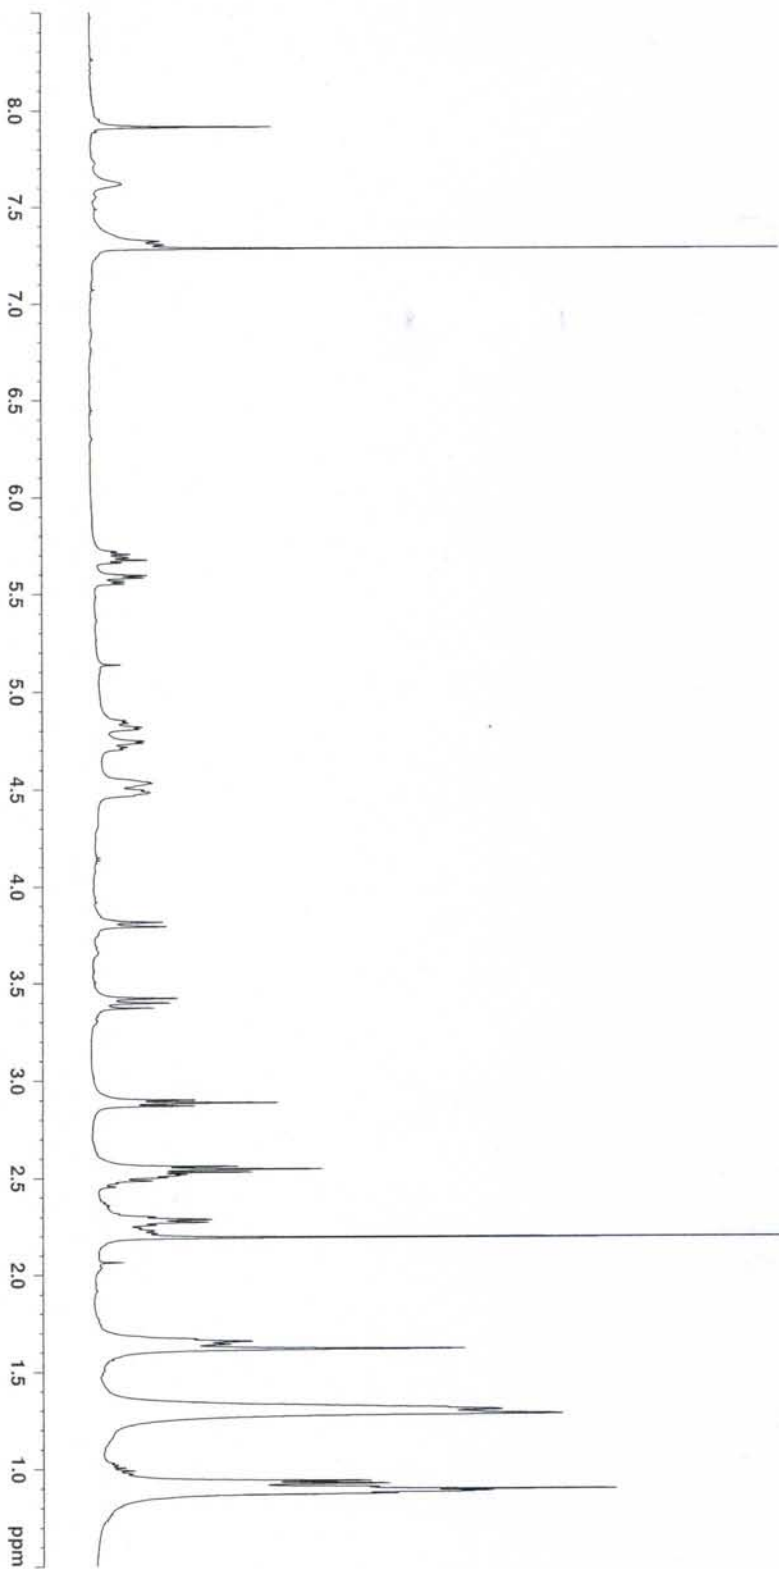

Current Data Parameters  
 Name 6-17-secocacid-CDCl3-1  
 EXNO 1  
 PROCNO 1

F2 - Acquisition Parameters  
 Date\_ 20080617  
 Time 18:37  
 INSTRUM spect  
 PROBRD 5 mm Multinuc1  
 PULPROG zgpg30  
 F2 4290  
 F1 101.25  
 SOLVENT CDCl3  
 NS 111  
 DS 2  
 SWH 10330.378 Hz  
 FIDRES 0.115633 Hz  
 AQ 3.411362 sec  
 RG 362  
 DW 48.400 usec  
 DE 6.00 usec  
 TE 300.2 K  
 D1 1.00000000 sec  
 DELT 0.00000000 sec  
 ACQRES 0.01500000 sec  
 MCHRFK

===== CHANNEL f1 =====  
 NUC1 1H  
 P1 14.80 usec  
 PL 0.00 dB  
 SFO1 500.0230978 MHz

F2 - Processing Parameters  
 SI 32768  
 SF 500.0200000 MHz  
 SOR 4.0  
 EQ 0  
 LB 0.30 Hz  
 GB 0  
 PC 1.00

<sup>1</sup>H NMR spectrum for compound 2 (500 MHz, CDCl<sub>3</sub>)

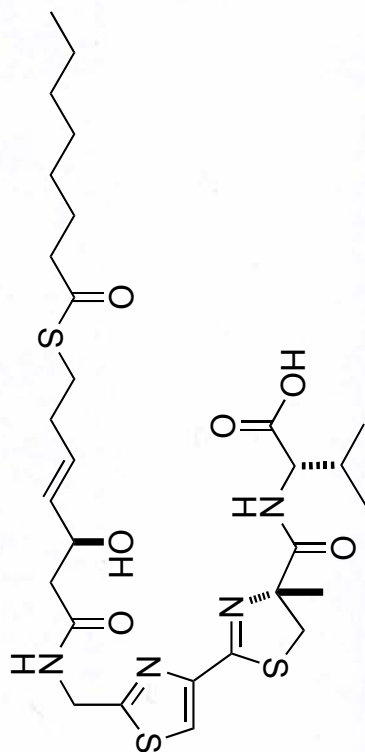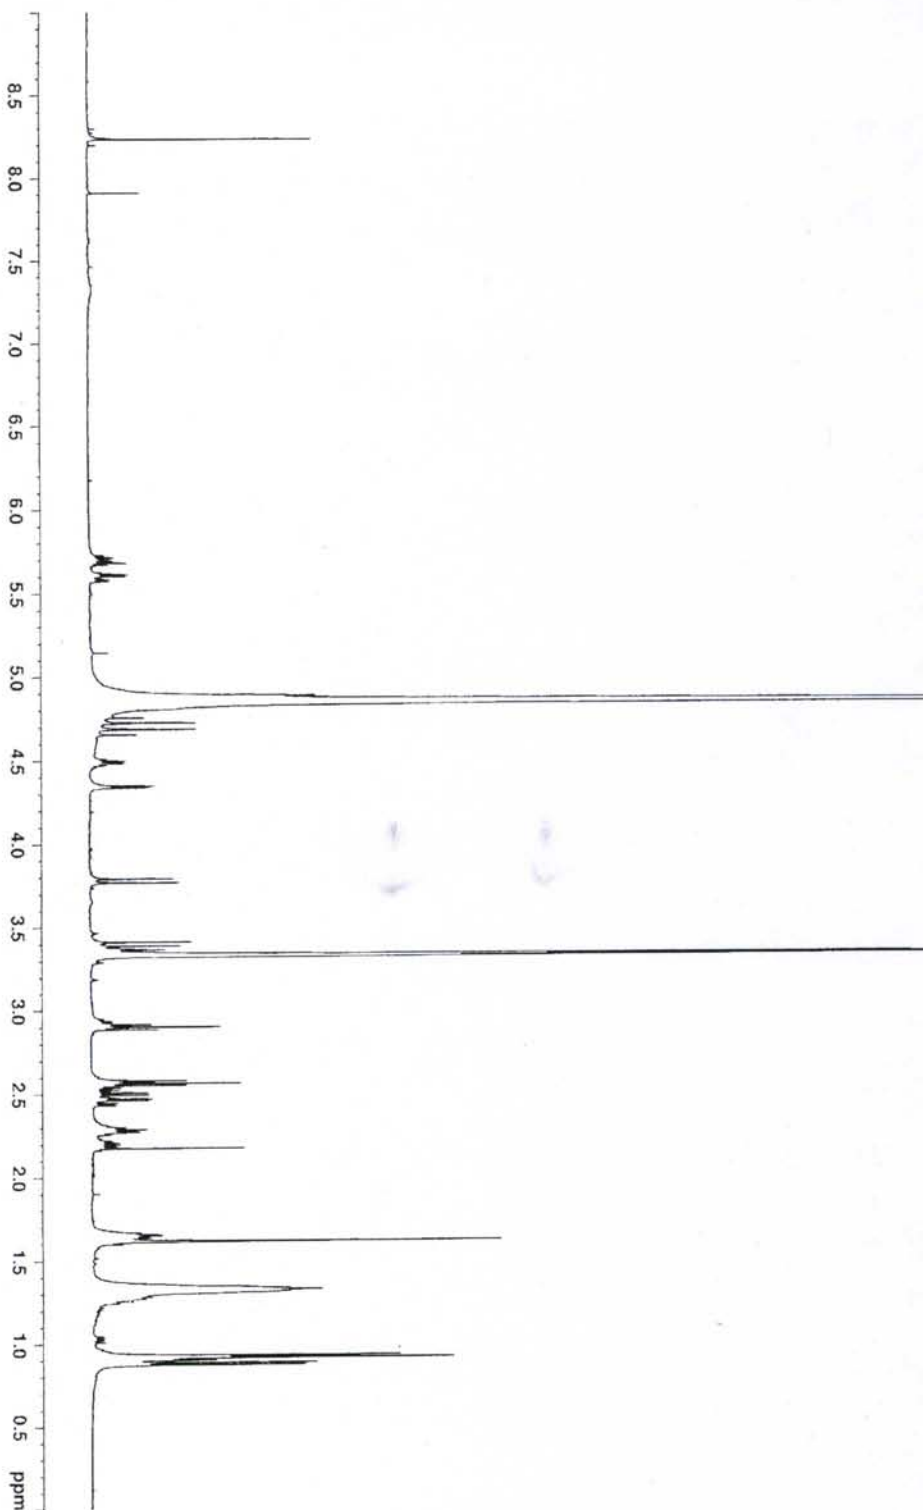

```

Dataul Data Parameters
NAME  JATBZVIMB0001472
EXPNO  1
PROCNO  1
AQ  10.00000000
RG  400.0000
Time  21.25
INSTRUM  spect
PROBHD  5 mm KAI-1001
PULPROG  zgpg30
SI  32768
SF  499.999
SOLVENT  Me2O
NS  2
DS  2
SWH  10352.074 Hz
FIDRES  0.177632 Hz
AQ  2.119205 sec
RG  400.0000
AC  48.400000
DE  6.000000
TE  300.2 K
WVFREQ  1.000000000 MHz
WWTXST  0.000000000 sec
WOMXK  0.015000000 sec
----- CHANNEL f1 -----
NUC1  1H
P1  14.00 usec
PL1  -1.00 dB
SFO1  500.0250000 MHz
F2 - Processing parameters
SI  32768
SF  500.0250000 MHz
WV  1.000000000 MHz
AQ  2.119205000 sec
TE  300.2 K
SOLVENT  Me2O

```

<sup>1</sup>H NMR spectrum for compound 2 (500 MHz, CD<sub>3</sub>OD)

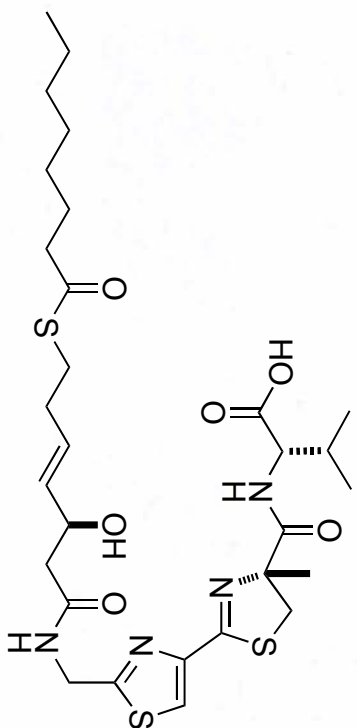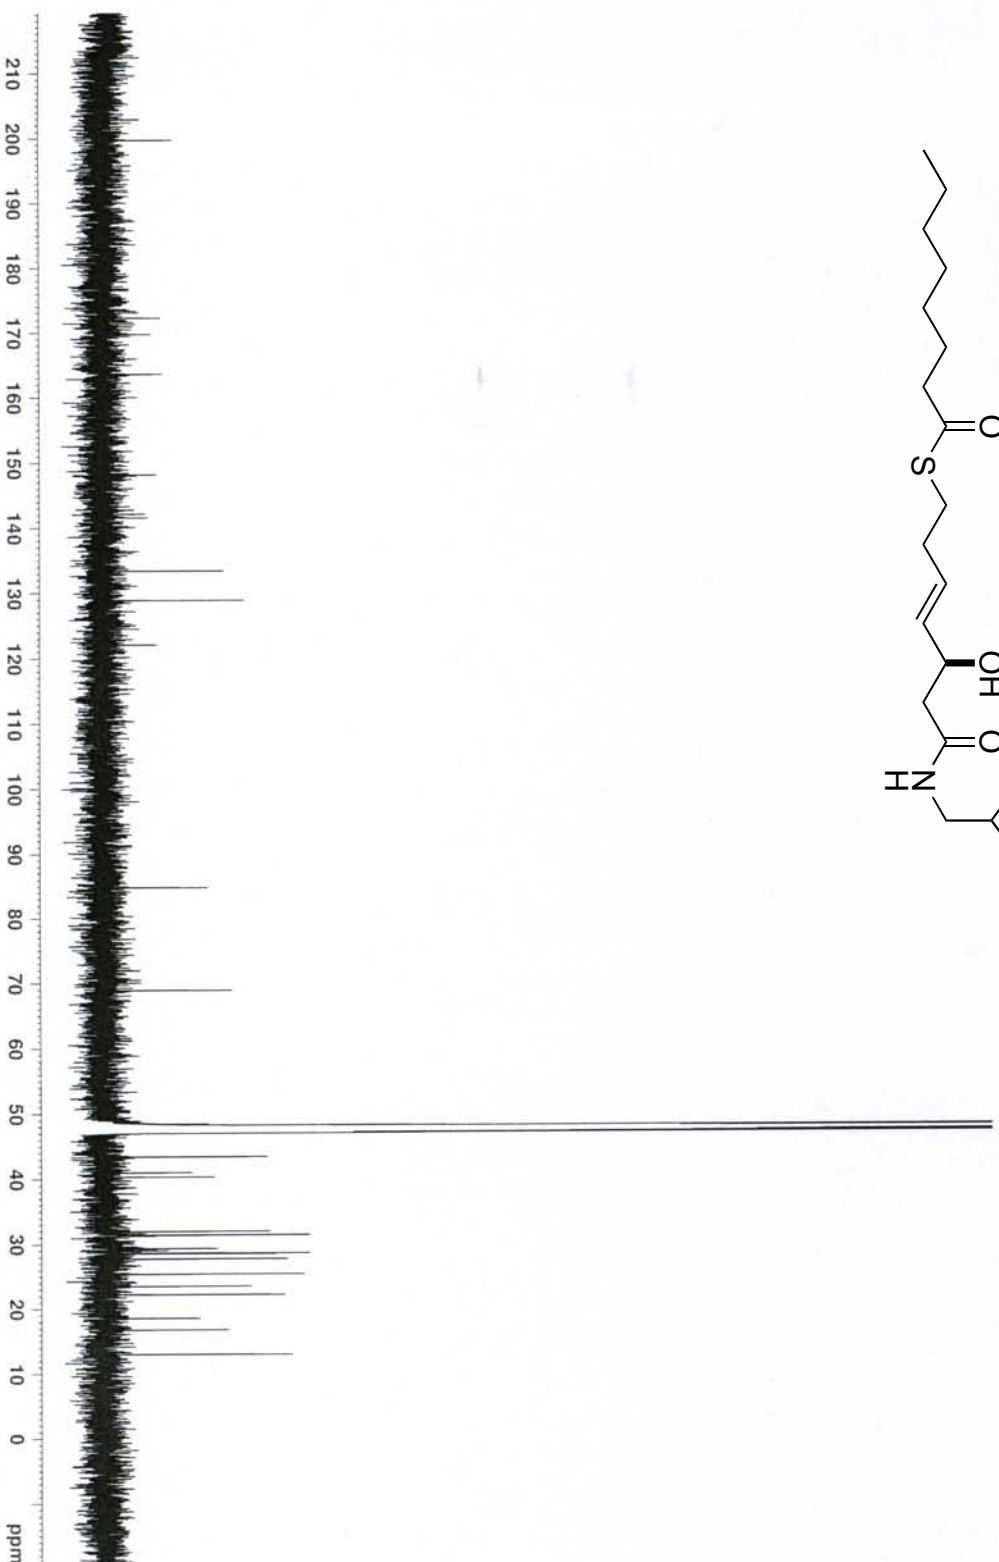

```

Current Data Parameters
EXNO      1
PROCNO    1
F2 - Acquisition Parameters
Date_     20100904
Time      0.46
INSTRUM   spect
PROBHD    5 mm QNP-1
PULPROG   zgpg30
TD         65536
SFO2      125.760
NUC1       13C
NUC2       13C
DS         4
SMB       30019.028 Hz
AQ        1.0912424 sec
RG         1094.498
PC         16.650 usec
DE         10.000 usec
TE         300.2 K
D1         2.00000000 sec
d111      0.03000000 sec
d112      0.00000000 sec
d113      0.00000000 sec
d114      0.00000000 sec
d115      0.01500000 sec
PCPRG2    waltz16
===== CHANNEL f1 =====
NUC1       13C
P1         21.000 usec
PL1        0.00 dB
SFO1      125.760380 MHz
===== CHANNEL f2 =====
NUC2       13C
P2         100.000 usec
PL2        -1.00 dB
SFO2      590.0220001 MHz
===== CHANNEL f3 =====
NUC3       13C
P3         125.760380 MHz
PL3        0.00 dB
SFO3      125.760380 MHz
===== CHANNEL f4 =====
NUC4       13C
P4         1.000 usec
PL4        0.00 dB
SFO4      1.40 MHz
  
```

<sup>13</sup>C NMR spectrum for compound 2 (500 MHz, CD<sub>3</sub>OD)

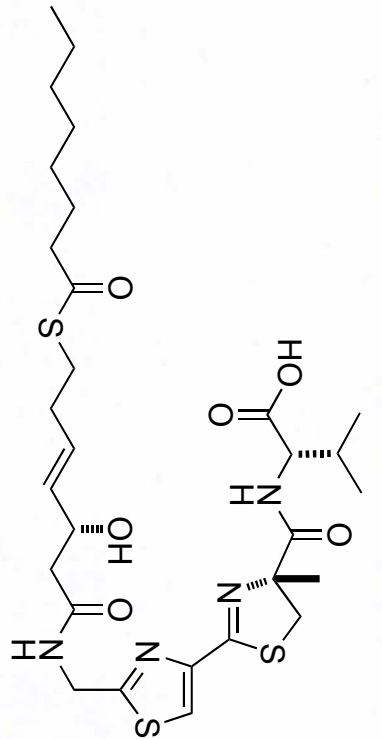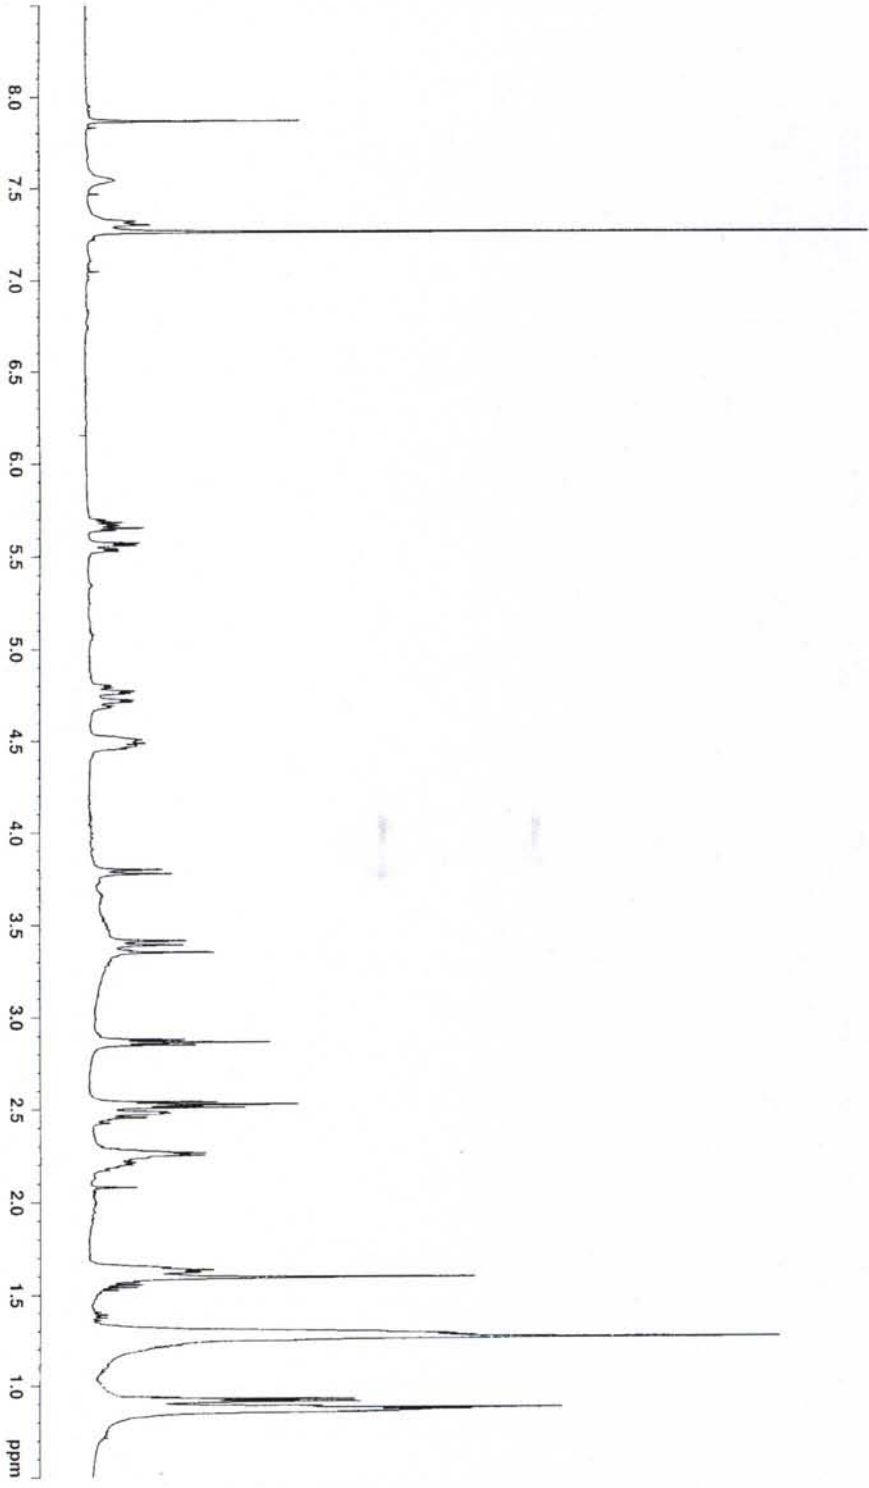

```

Current Data Parameters
NAME: 17-epi-2
EXPNO: 1
PROCNO: 1
F2 - Acquisition Parameters
Date_ 20040418
Time 20.48
INSTRUM spect
PROBHD 5mm
PULPROG zgpg30
TD 65536
SFO 500.136188
WDW EM
SSB 0
RG 320.0
AQ 0.187500
FIDRES 0.001278 Hz
AQRES 0.001278 Hz
NUC1 13C
NUC2 13C
PC 1.00
===== CHANNEL f1 =====
NUC1 13C
P1 14.40 usec
PL1 -1.00 dB
F1 500.136188 MHz
SFO 500.136188 MHz
===== Processing parameters =====
SI 32768
SF 500.136188 MHz
WDW EM
SSB 0
RG 320.0
AQ 0.187500
PC 1.00
  
```

<sup>1</sup>H NMR spectrum for compound 17-*epi*-2 (500 MHz, CDCl<sub>3</sub>)





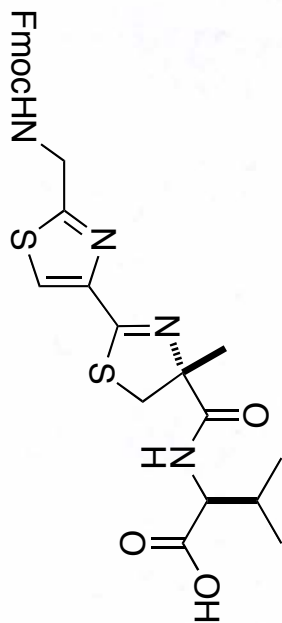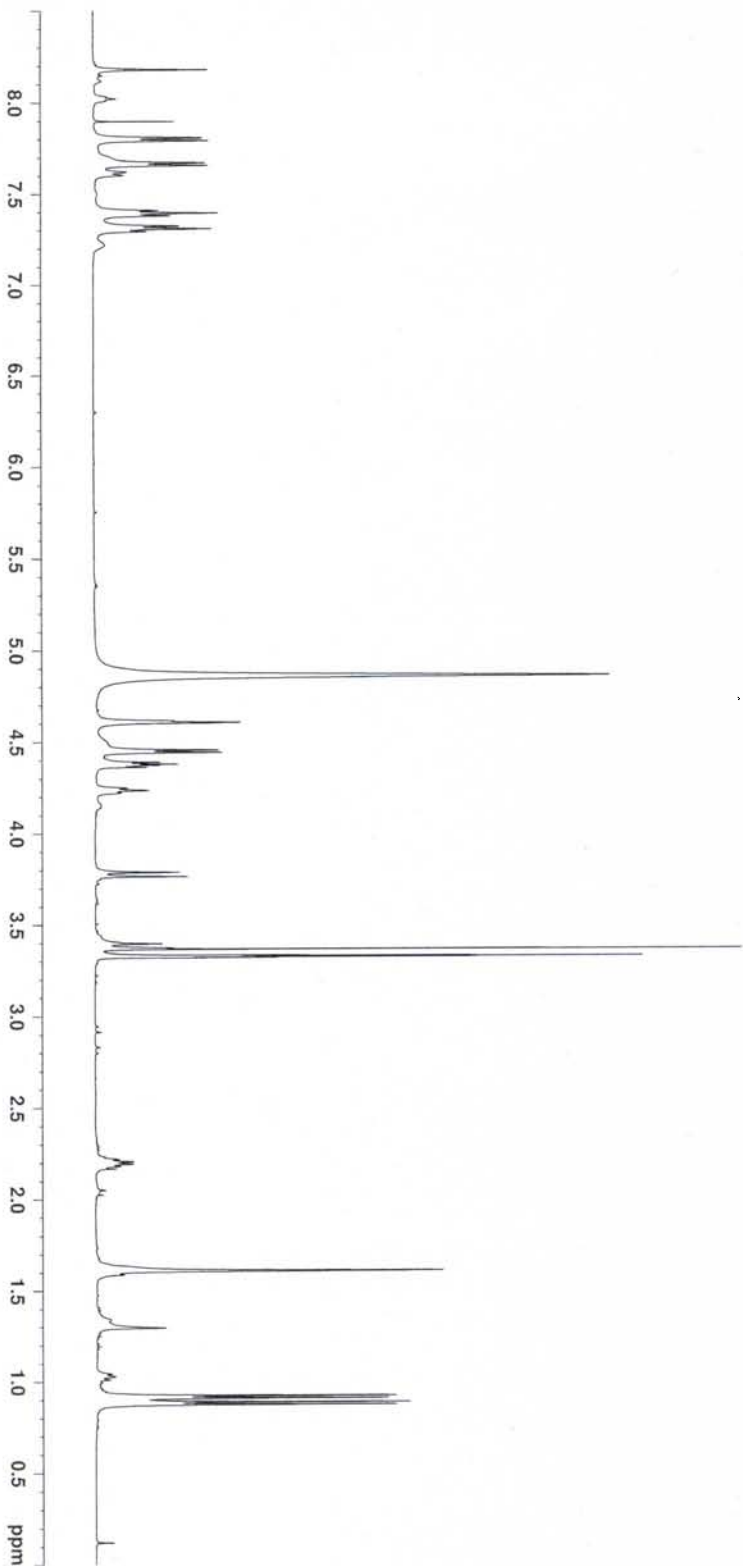

```

Compound 30a: 3-oxo-2-((S)-2-hydroxypropanoylamino)ethyl-1-methyl-1H-thiazole-4-carboxamide
NAME: 30a
EXPNO: 1
PROCNO: 1
F2 - Acquisition Parameters
Date_UTC: 20111220
Time: 20.12
INSTRUM: spect
PROBHD: 5 mm BBIKQNP1
PULPROG: zgpg30
TD: 65536
AQ: 0.020000000
RG: 327.500
AQ: 0.020000000
SOLVENT: H2O
NUC1: 13C
NUC2: 13C
NUC3: 13C
NUC4: 13C
NUC5: 13C
NUC6: 13C
PC: 1.000000000
TE: 300.2 K
FIDRES: 0.151562 Hz
AQRES: 0.000000000
SFO: 125.761 MHz
SF: 125.761 MHz
WDW: EM
SSB: 0
GB: 0
PC: 1.00
===== CHANNEL f1 =====
NUC1: 13C
P1: 14.00
PL1: 0 dB
F1: 125.761 MHz
SFO1: 125.761 MHz
===== CHANNEL f2 =====
NUC1: 13C
P1: 14.00
PL1: 0 dB
F1: 125.761 MHz
SFO1: 125.761 MHz
F2 - Processing parameters
SI: 327.500
SF: 500.1363000 MHz
WDW: EM
SSB: 0
GB: 0
PC: 1.00

```

<sup>1</sup>H NMR spectrum for compound **30** (500 MHz, CDCl<sub>3</sub>)



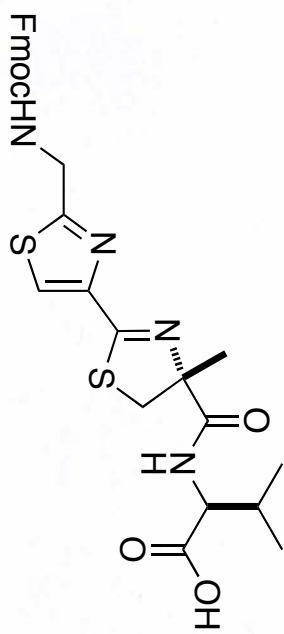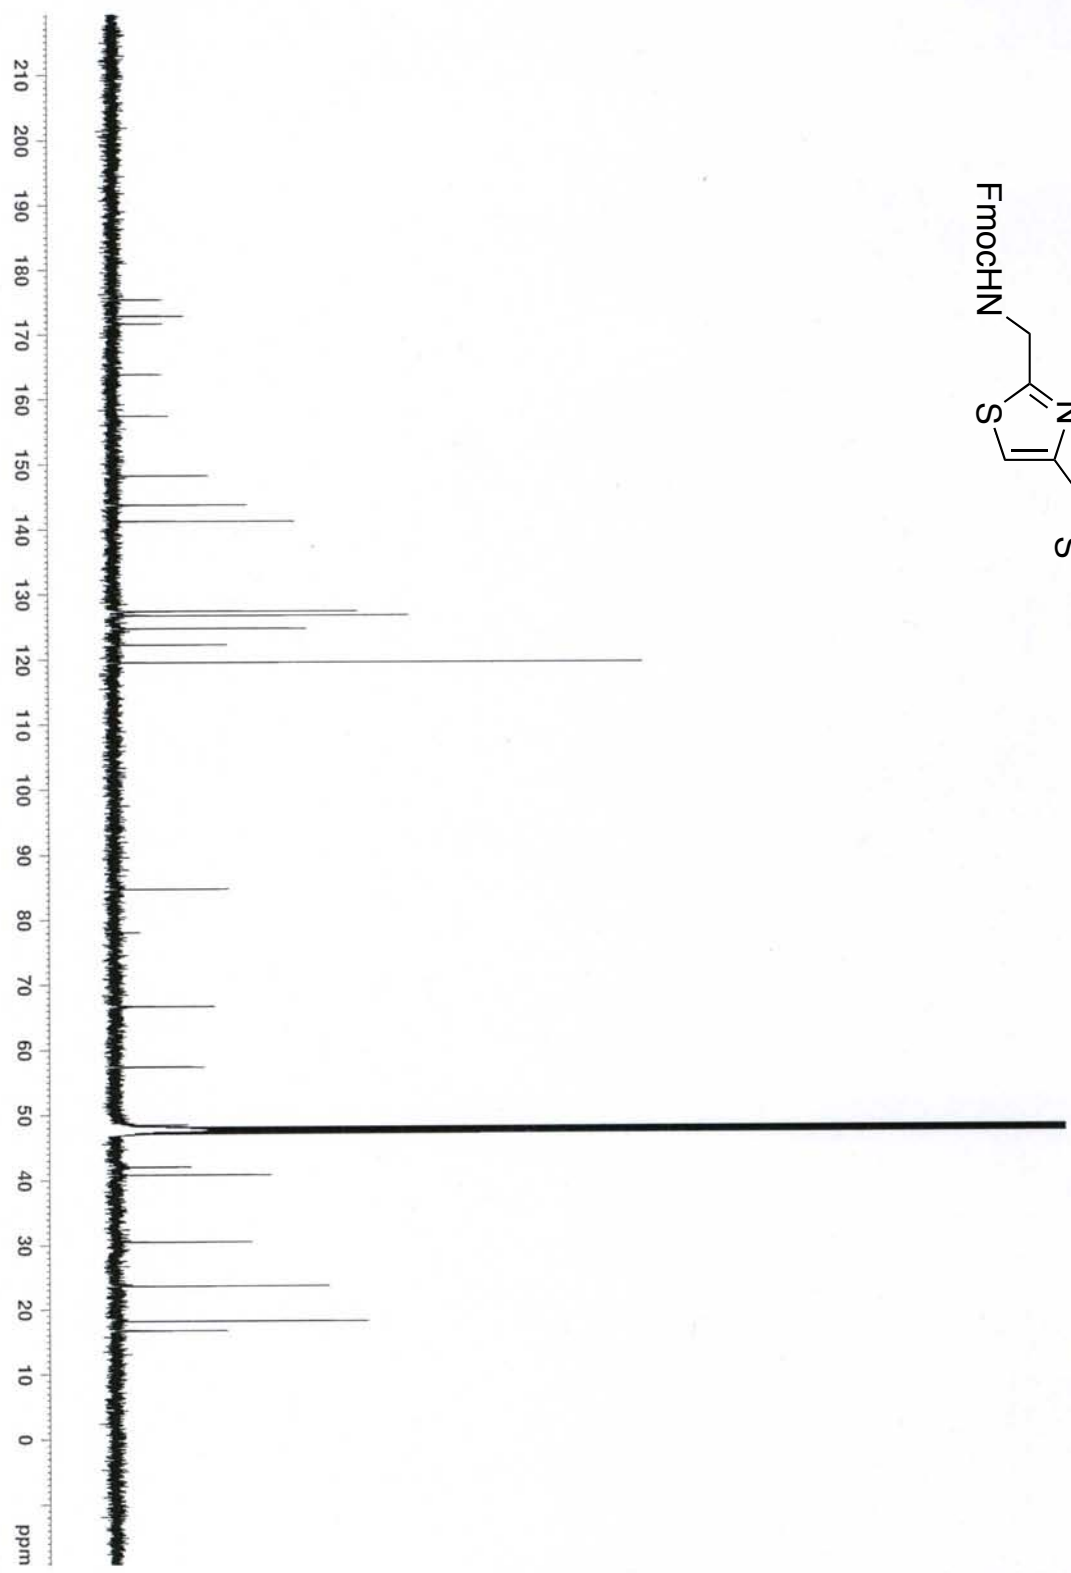

Output: Data Parameters  
 Name: FmocMethylthiazolone-1-1  
 P1: Acquisition Parameters  
 Date\_ : 2018  
 Time : 12:50:00  
 Instrument: spect  
 Processor: 402316  
 F2: 125.762175 MHz  
 Solvent: CDCl3  
 DE: 90.000000 Hz  
 TE: 300.2 K  
 F1: 500.136260 MHz  
 AQ: 1.00000000 sec  
 FT: 32768  
 SFO: 125.762175 MHz  
 PC: 14.000000 sec  
 F2 - Processing parameters  
 Date\_ : 2018  
 Time : 12:50:00  
 Instrument: spect  
 Processor: 402316  
 F2: 125.762175 MHz  
 Solvent: CDCl3  
 DE: 90.000000 Hz  
 TE: 300.2 K  
 F1: 500.136260 MHz  
 AQ: 1.00000000 sec  
 FT: 32768  
 SFO: 125.762175 MHz  
 PC: 14.000000 sec

<sup>13</sup>C NMR spectrum for compound 30 (500 MHz, CDCl<sub>3</sub>)

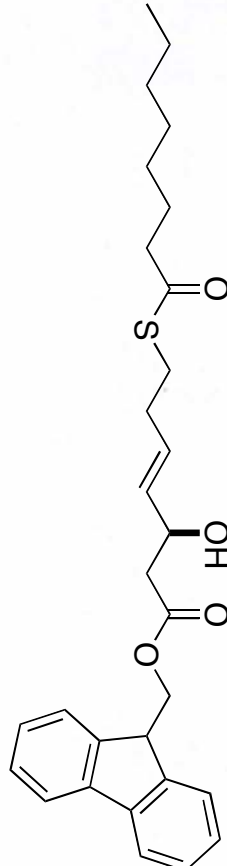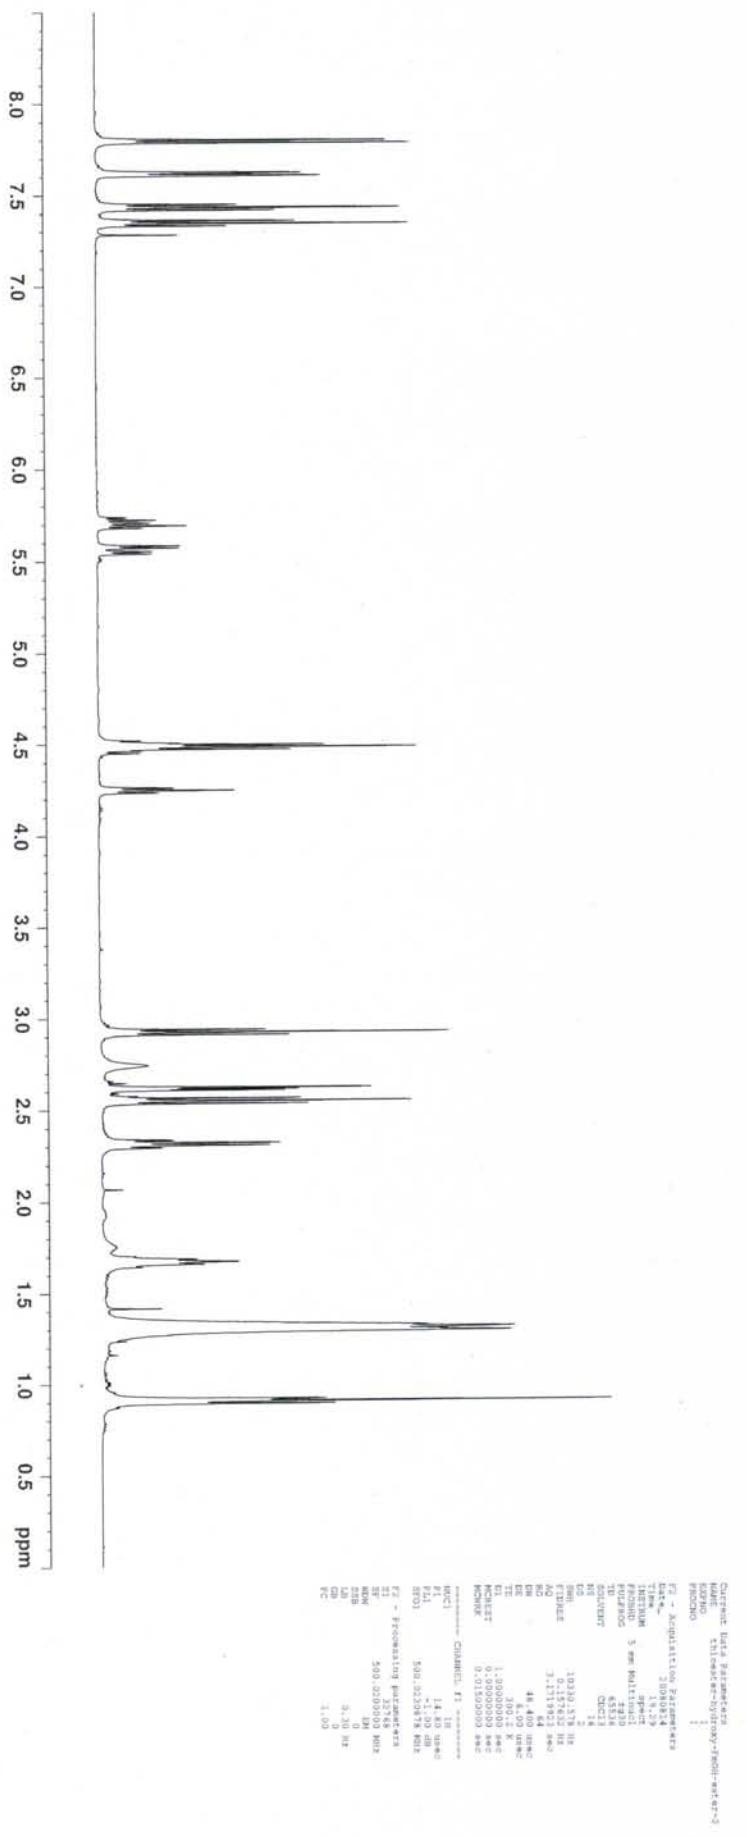

<sup>1</sup>H NMR spectrum for compound **31** (500 MHz, CDCl<sub>3</sub>)



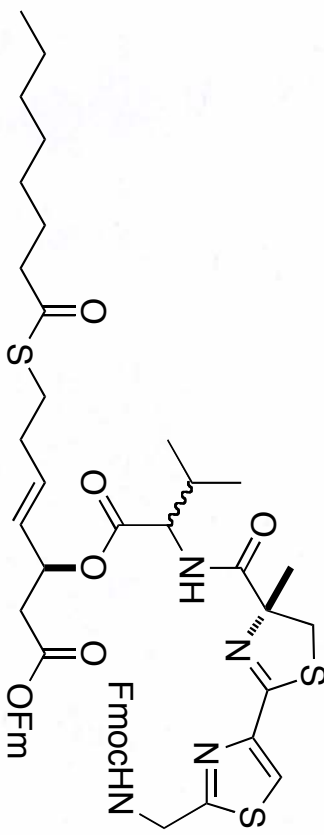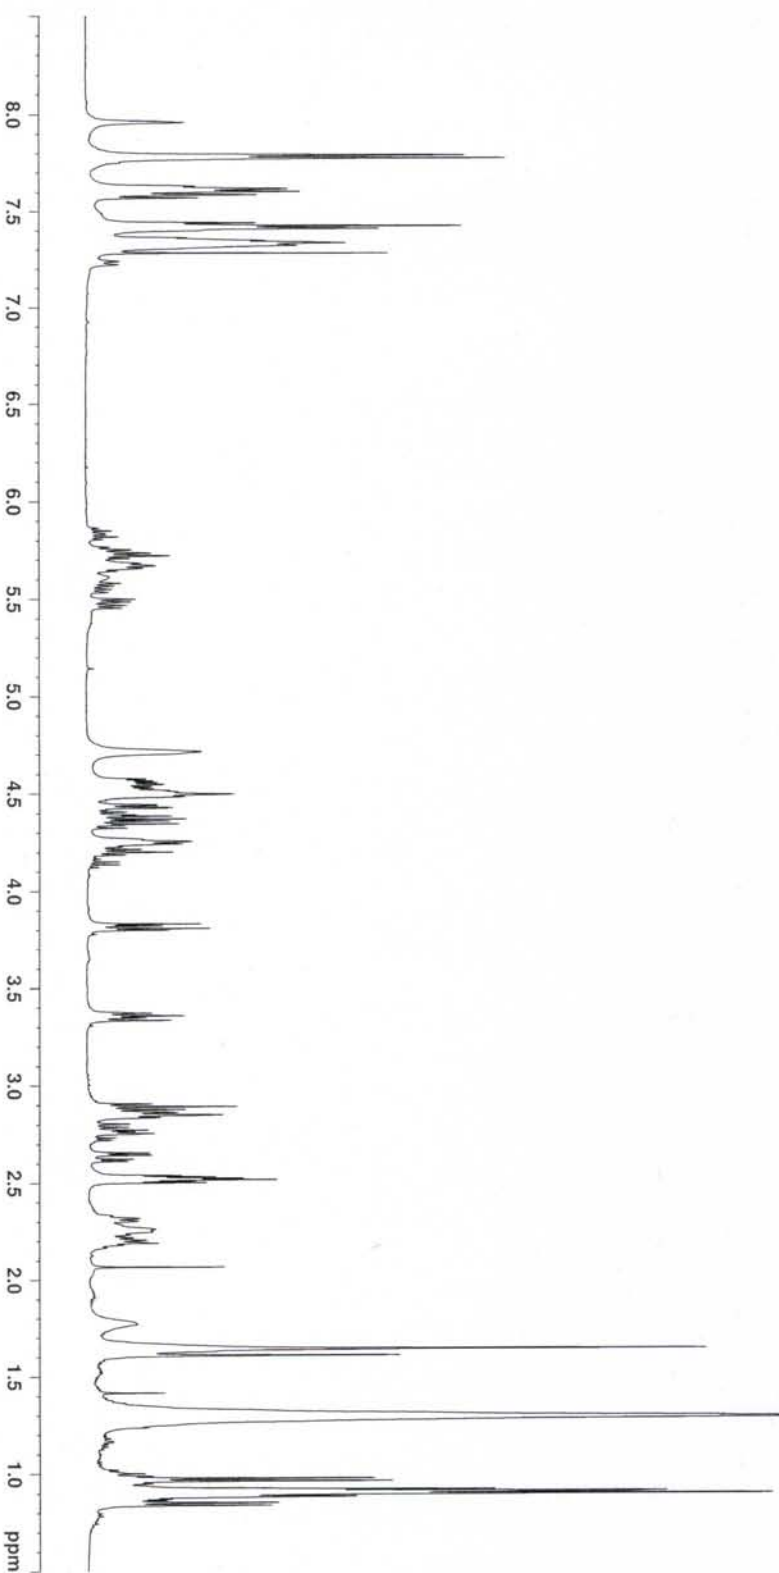

Current Data Parameters  
 NAME FmocHN-FmocHeater-1  
 EXPNO 1  
 PROCNO 1

F2 - Acquisition Parameters  
 Date\_ 20080915  
 Time 19:21  
 INSTRUM spect  
 PROBRD 5 mm MSL1000  
 PULPROG zgpg30  
 TD 65536  
 SOLVENT CDCl3  
 NS 16  
 DS 2  
 SMR 10330.578 Hz  
 FIDRES 0.117622 Hz  
 AQ 3.117928 sec  
 RQ 2.2228 sec  
 DE 48.400 usec  
 TE 300.2 K  
 D1 1.00000000 sec  
 MCREST 0.00000000 sec  
 MCWRR 0.01500000 sec

\*\*\*\*\* CHANNEL f1 \*\*\*\*\*  
 NUC1 1H  
 P1 14.50 usec  
 PL1 -1.00 dB  
 SFO1 500.0230879 MHz

F2 - Processing parameters  
 SI 32768  
 SF 500.0200000 MHz  
 MDW 0  
 EX 0  
 SSB 0.30 Hz  
 GB 0  
 PC 1.40

<sup>1</sup>H NMR spectrum for compound **32** (2R : 2S = 1.5 : 1, 500 MHz, CDCl<sub>3</sub>)

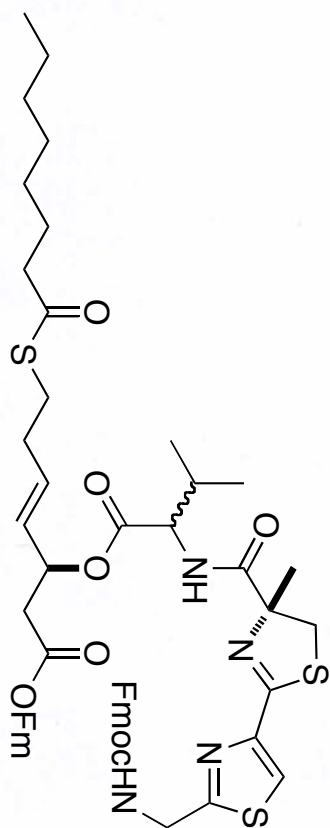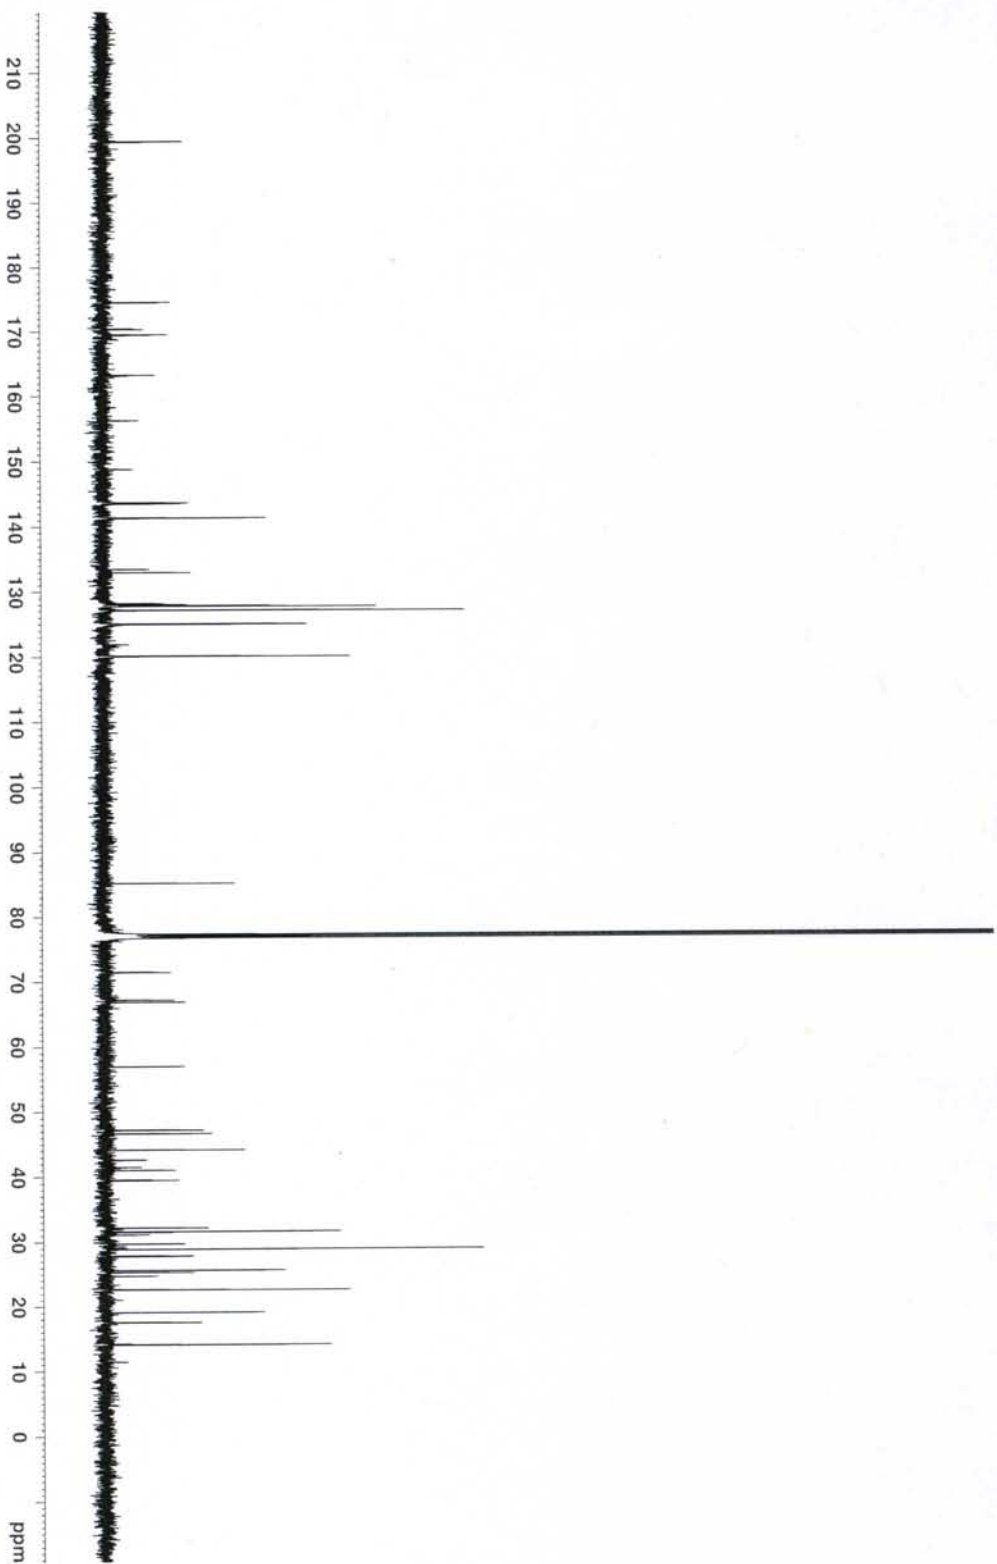

$^{13}\text{C}$  NMR spectrum for compound **32** ( $2R : 2S = 1.5 : 1$ , 500 MHz,  $\text{CDCl}_3$ )

Current Data Parameters  
 NAME FmocNH-FmocHeater-I-C  
 EXNO 1  
 PROCNO 1

F2 - Acquisition Parameters  
 Date\_ 20090919  
 Time 11:05:03  
 INSTRUM spect  
 PROBRD 5 mm Multinuc1  
 PULPROG zgpg30  
 TD 65536  
 SOLVENT CDCl3  
 NS 1024  
 DS 4  
 SFO 300.10 029 Hz  
 FIDRES 0.458322 Hz  
 AQ 1.0912344 sec  
 RG 7298.2  
 DW 16.650 usec  
 DE 12.00 usec  
 TE 300.2 K  
 AT 2.000000 sec  
 d11 0.03000000 sec  
 DELTA 1.89999998 sec  
 MCREST 0.00000000 sec  
 MCMRFX 0.01500000 sec

===== CHANNEL #1 =====  
 NUC1 13C  
 P1 12.00 usec  
 PL 3.00 dB  
 SFO1 125.7427020 MHz

===== CHANNEL #2 =====  
 CPDPRG2 waltz16  
 NUC2 1H  
 P2 100.00 usec  
 PL2 -1.00 dB  
 PL12 18.80 dB  
 PL13 22.50 dB  
 SFO2 500.0220001 MHz

F2 - Processing parameters  
 SI 32768  
 SF 125.7304296 MHz  
 MDI EM  
 SSB 0  
 LB 1.00 Hz  
 GB 0  
 PC 1.00

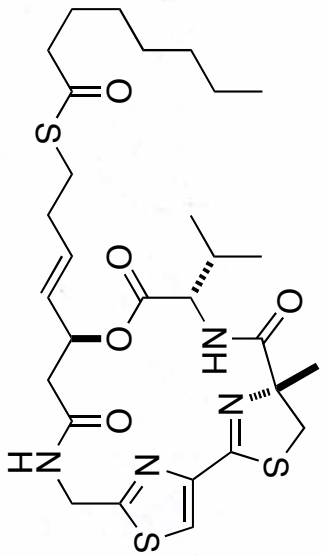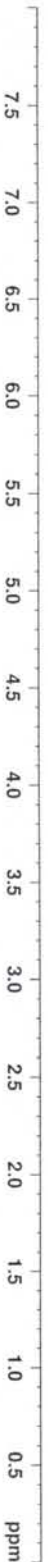

```

Current Data Parameters
NAME      11-largetazole-4
EXPNO     1
PROCNO    1

F2 - Acquisition Parameters
Date_     20091116
Time      12:40
INSTRUM   spect
PROBHD    5 mm Multinucl
PULPROG   zg30
TD         65536
SOLVENT   CDCl3
NS         16
DS         2
SWH        10330.578 Hz
FIDRES     0.119824 Hz
AQ         3.119824 sec
RG         645.1
DW         48.400 usec
DE         6.00 usec
TE         300.2 K
D1         1.00000000 sec
D2         0.00000000 sec
D3         0.00000000 sec
D4         0.01500000 sec
MCREST    0.01500000 sec
KCMRKR

===== CHANNEL f1 =====
NUC1       1H
P1         14.80 usec
PL1        -1.00 dB
SFO1       500.0230878 MHz

F2 - Processing parameters
SI         32768
SF         500.0200000 MHz
RG         645.1
WDW        EM
SSB        0
GB         0
PC         1.00
  
```

<sup>1</sup>H NMR spectrum for largetazole (**1**) (500 MHz, CDCl<sub>3</sub>)

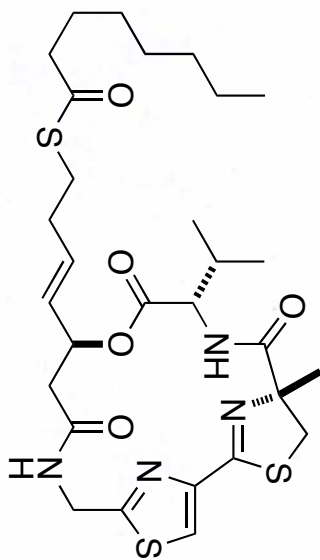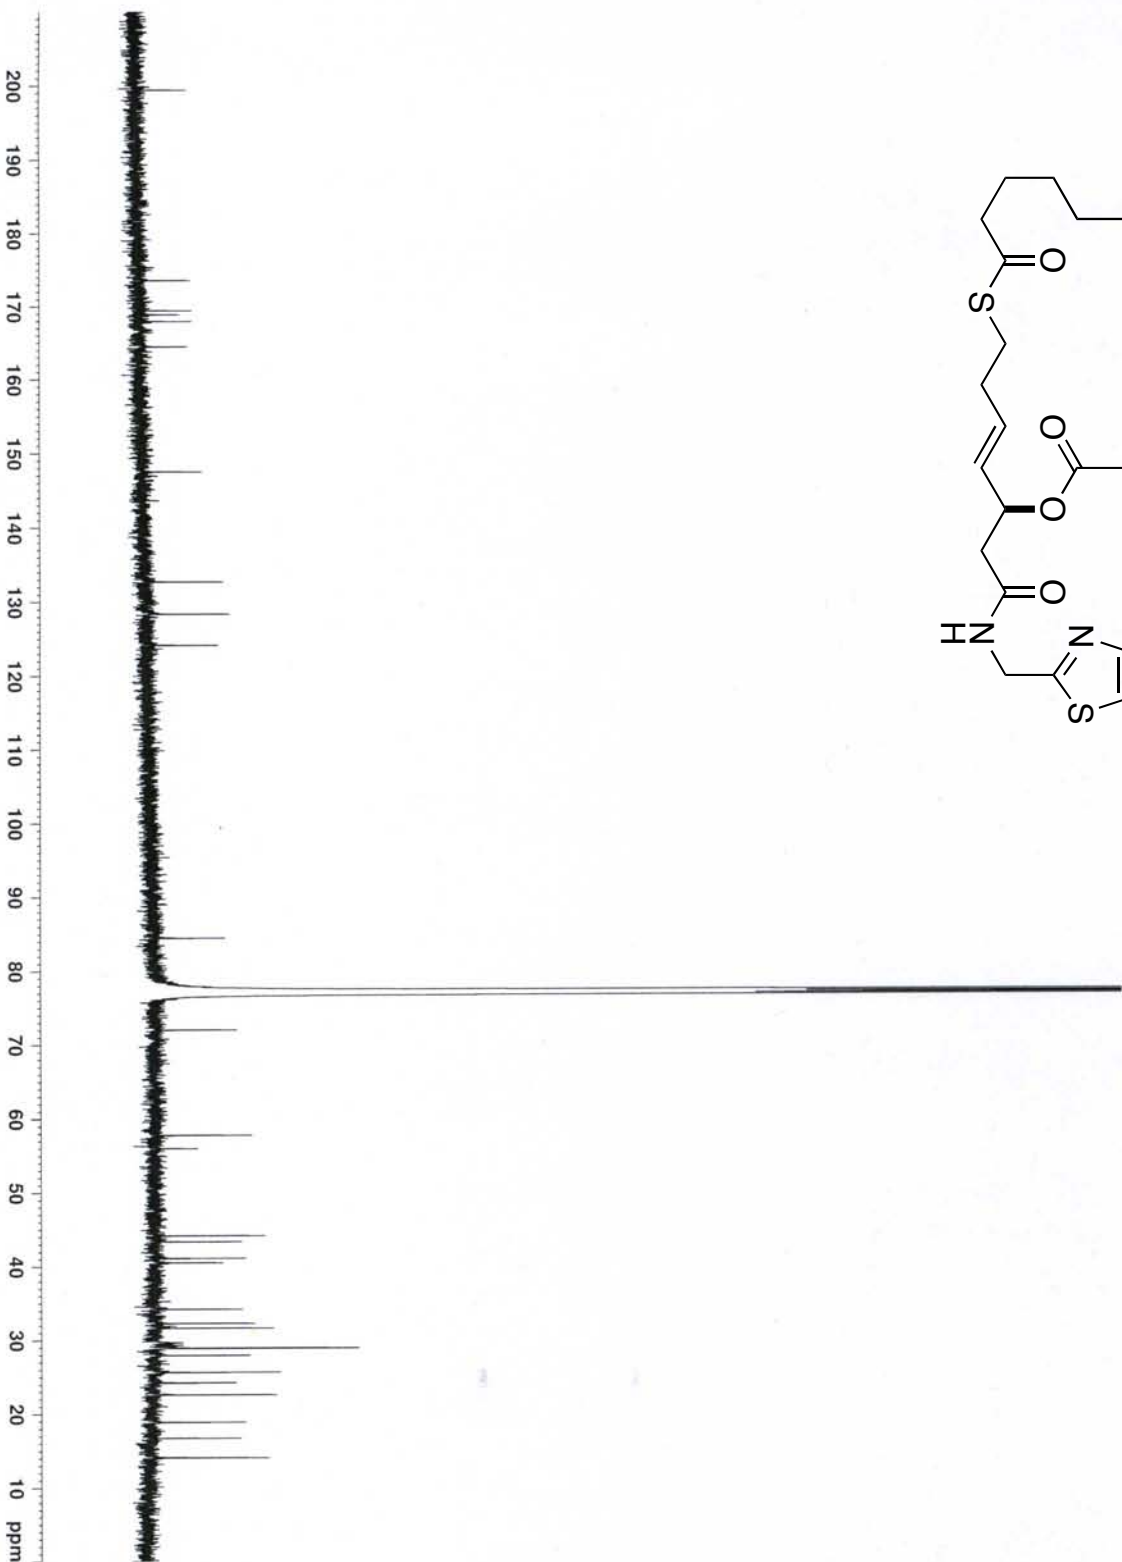

Current Data Parameters  
 NAME 11-largazole-S-C  
 EXPNO 1  
 PROCNO 1

F2 - Acquisition Parameters  
 Date\_ 20081121  
 Time 23:10  
 INSTRUM spect  
 PROBRD 5 mm Maltinnici  
 F2P1 200930  
 F2P2 200930  
 F2P3 200930  
 T0 200930  
 SOLVENT CDCl3  
 NS 49033  
 DS 4

SWH 30030.029 Hz  
 FIDRES 0.458222 Hz  
 AQ 1.0912244 sec  
 RG 3251  
 DM 14.650 usec  
 DE 360.0 usec  
 TE 300.2 K  
 FI 2.00000000 sec  
 d11 0.03000000 sec  
 DELTA 1.89999998 sec  
 XCFREST 0.00000000 sec  
 XCMRCK 0.01500000 sec

===== CHANNEL F1 =====  
 NUCL 13C  
 P1 12.00 usec  
 PL1 3.00 dB  
 SFO1 125.7427020 MHz

===== CHANNEL F2 =====  
 CHDRG2 waltz16  
 NUCL2 1H  
 PCPD2 100.00 usec  
 PL2 1.00 dB  
 PL12 15.39 dB  
 PL13 15.39 dB  
 SFO2 500.0220001 MHz

F2 - Processing parameters  
 SI 32768  
 SF 125.7301290 MHz  
 WDW EM  
 SSB 0  
 LB 1.00 Hz  
 GB 0  
 FC 1.40

$^{13}\text{C}$  NMR spectrum for largazole (1) (500 MHz,  $\text{CDCl}_3$ )

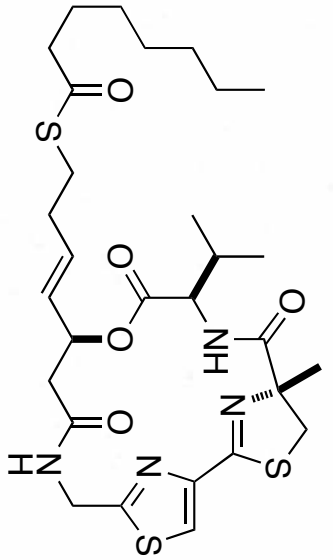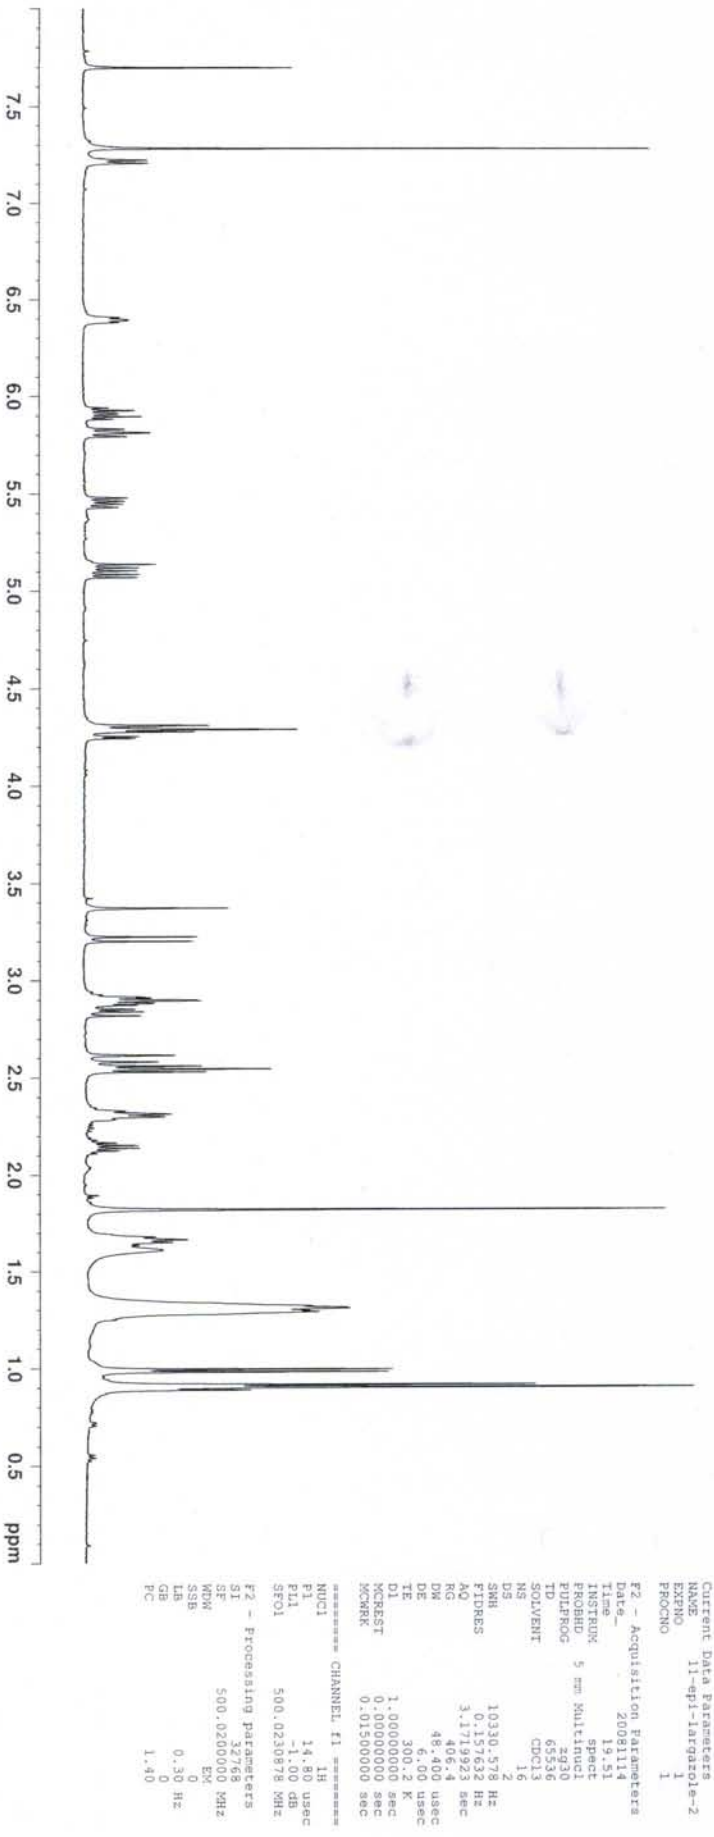

<sup>1</sup>H NMR spectrum for 2-*epi*-largazole (**33**) (500 MHz, CDCl<sub>3</sub>)



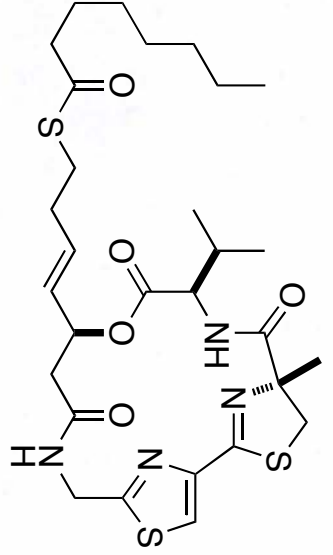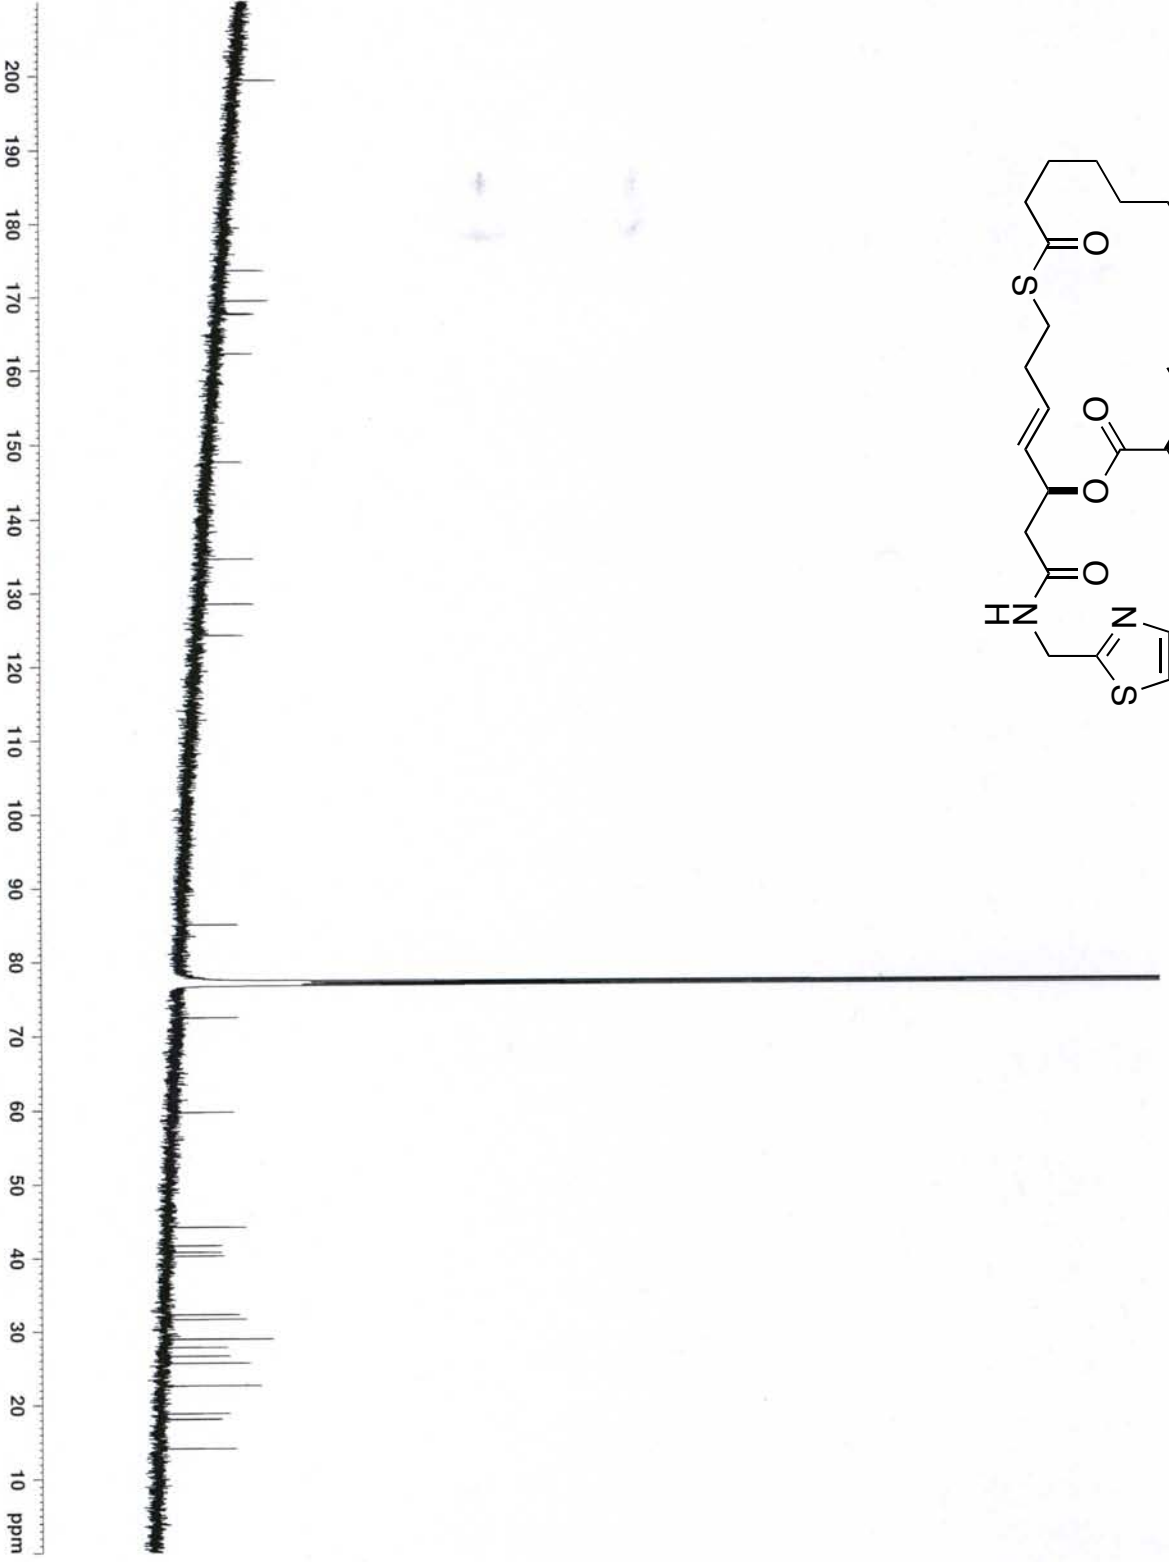

$^{13}\text{C}$  NMR spectrum for 2-*epi*-largazole (**33**) (500 MHz,  $\text{CDCl}_3$ )

```

Current Data Parameters
NAME      11-epi-largazole-3-C
EXPNO    1
PROCNO   1

F2 - Acquisition Parameters
Date_    20081116
Time     18.14
INSTRUM  spect
PROBHD   5 mm Multinuc1
PULPROG  zgpg30
TD       65536
SOLVENT  CDCl3
NS       4094
DS       4
SFO      30030.029 Hz
FIDRES   0.458222 Hz
AQ       1.091244 sec
RG       1625.5
DW       16.650 usec
DE       16.00 usec
TE       300.2 K
D1       2.00000000 sec
d11      0.03000000 sec
DELTA    1.89999998 sec
MCREST   0.00000000 sec
MCWRRK   0.01500000 sec

===== CHANNEL f1 =====
NUC1      13C
P1        13.00 usec
PL        3.00 dB
SFO1     125.7627020 MHz

===== CHANNEL f2 =====
CPDPRG2   waltz16
NUC2      13C
PCPD2     100.00 usec
PL2       -1.00 dB
PL12      15.59 dB
PL13      22.50 dB
SFO2     500.0220001 MHz

F2 - Processing parameters
SFO      125.7301290 MHz
SF       32766
WDW      EM
SSB      0
LB       1.00 Hz
GB       0
PC       1.00
  
```
